# Partitioning the heart: mechanisms of cardiac septation and valve development

Chien-Jung Lin<sup>1,\*</sup>, Chieh-Yu Lin<sup>1,\*</sup>, Chen-Hao Chen<sup>1</sup>, Bin Zhou<sup>2,†</sup> and Ching-Pin Chang<sup>1,†</sup>

## Summary

Heart malformations are common congenital defects in humans. Many congenital heart defects involve anomalies in cardiac septation or valve development, and understanding the developmental mechanisms that underlie the formation of cardiac septal and valvular tissues thus has important implications for the diagnosis, prevention and treatment of congenital heart disease. The development of heart septa and valves involves multiple types of progenitor cells that arise either within or outside the heart. Here, we review the morphogenetic events and genetic networks that regulate spatiotemporal interactions between the cells that give rise to septal and valvular tissues and hence partition the heart.

**Key words:** Signaling, Cardiac septation, Congenital heart disease, Heart development, Transcription, Valve development

## Introduction

A mature mammalian heart has four valves and four chambers, with the wall of each chamber consisting of three tissue layers: endocardium, myocardium and epicardium (Fig. 1). The cardiac chambers and valves are organized such that they separate systemic from pulmonary circulation and ensure directional blood flow. The formation of these structures requires multiple cell types and complex morphogenetic processes, which often go awry in the developing human fetus. Heart malformations account for as many as 30% of embryos or fetuses lost before birth (Hoffman, 1995), and the incidence of heart defects in live births varies from 0.4% to 5% in different studies, depending on the severity of heart defects included in the statistics (Hoffman and Kaplan, 2002). On top of these statistics, another 2% of newborns have bicuspid aortic valves (BAVs; see Glossary, Box 1) or other defects (Hoffman and Kaplan, 2002), which may cause significant morbidity and mortality later in life (Brickner et al., 2000a). Congenital heart malformations, therefore, constitute an important medical issue challenging our society.

The heart of developing embryos originates from mesodermal cells located in the anterior part of the primitive streak (Lawson et al., 1991; Tam et al., 1997) (Fig. 2). During gastrulation, these cardiac mesodermal cells migrate from the streak to the splanchnic mesoderm underlying the head folds to form cardiac crescent (the first heart field, FHF; see Glossary, Box 1) (Abu-Issa and Kirby, 2007; Vincent and Buckingham, 2010) (Fig. 2A,B). As the embryo grows, the crescent of the FHF fuses in the ventral midline, forming a trough-like structure, which then closes dorsally to form a

primitive heart tube (Fig. 2C). The heart tube is suspended from the body wall by dorsal mesocardium (Fig. 2D), and the tube elongates on both the arterial and venous poles via the addition of progenitor cells originating from the secondary heart field (SHF; see Glossary, Box 1), which lies medially and posteriorly to the crescent (Kelly et al., 2001; Mjaatvedt et al., 2001; Waldo et al., 2001; Cai et al., 2003). Concurrent with heart tube elongation, the dorsal mesocardium dissolves except at the poles, liberating the majority of the heart tube and allowing it to undergo rightward looping. The looped heart tube, composed of an inner endocardial lining and an outer myocardial layer, is segmented into the atrium, the atrioventricular canal (AVC; see Glossary, Box 1), the ventricle and the outflow tract (OFT; see Glossary, Box 1) (Fig. 2E). In the lumen of the AVC and proximal OFT, local tissue swellings, termed endocardial cushions, are formed by the accumulation of abundant extracellular matrix (cardiac jelly) in between the endocardium and myocardium (Fig. 2F). These endocardial cushions are subsequently populated by mesenchymal cells that descend from the endocardium. In addition, within the lumen of the distal OFT, local tissue swellings (termed truncal cushions) arise and are later populated by mesenchymal cells originating from the neural crest. While the cushions are developing, a sheath of cells, which originate from the proepicardial organ, grows over the myocardium of the heart tube to form the outermost epicardial layer of the heart (Fig. 2E-G). Later in development, the atrial and ventricular chambers divide into two atria (left and right) and two ventricles (left and right), forming a prototypic four-chamber heart (Fig. 2G). Along with chamber septation, the AVC separates into left (mitral) and right (tricuspid) orifices, forming ventricular inlets that connect the respective atrium to the ventricle. The outflow tract divides into the left and right ventricular outlets that connect the left and right ventricle, respectively, to the aorta and pulmonary trunk. These septation events segregate the systemic from pulmonary circulation. In addition, the AVC endocardial cushions develop into atrioventricular (mitral and tricuspid) valves, whereas the OFT endocardial cushions give rise to semilunar (aortic and pulmonic) valves (Fig. 1). The formation of heart valves ensures that blood flows in one direction from the atria to ventricles and then to the arteries.

Multiple cells of distinct developmental origins contribute to the formation of a heart. Lineage tracing and clonal analyses in mice show the existence of two distinct myocardial lineages arising separately from the FHF and SHF. The FHF lineage contributes primarily to the myocardium of the left ventricle (Buckingham et al., 2005; Srivastava, 2006), whereas the SHF lineage contributes to the myocardium of the atria (Cai et al., 2003; Galli et al., 2008), right ventricle and outflow tract (Kelly et al., 2001; Cai et al., 2003; Zaffran et al., 2004; Verzi et al., 2005). By contrast, the epicardium arises from the proepicardial organ, which is located near the venous pole of the heart tube and originates from the coelomic mesenchyme of septum transversum (Männer et al., 2001) (Fig. 2E). Cells in the epicardium give rise to mesenchymal cells that

<sup>1</sup>Division of Cardiovascular Medicine, Department of Medicine, Stanford Cardiovascular Institute, Stanford University, Stanford, California 94305, USA.

<sup>2</sup>Departments of Genetics, Medicine, and Pediatrics, Albert Einstein College of Medicine, Bronx, New York 10461, USA.

\*These authors contributed equally to this work

†Authors for correspondence (bin.zhou@einstein.yu.edu; chingpin@stanford.edu)

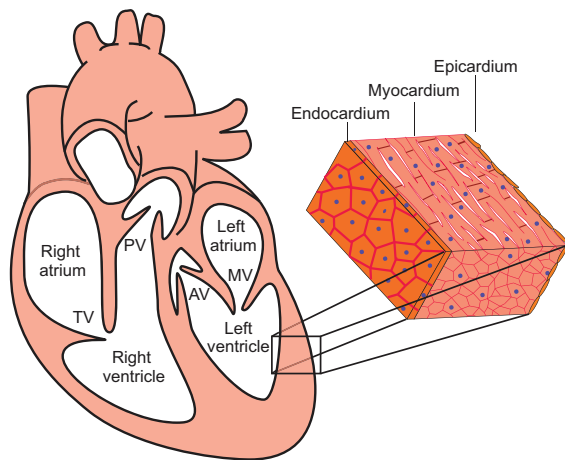

**Fig. 1. The structure of a mammalian heart.** A mature mammalian heart contains four chambers (right atrium, left atrium, right ventricle, left ventricle) and four valves (pulmonary valve, PV; tricuspid valve, TV; atrial valve, AV; mitral valve, MV). The wall of each chamber consists of three tissue layers: endocardium, myocardium and epicardium.

migrate into the myocardium and differentiate into fibroblasts and coronary smooth muscle cells (Merki et al., 2005). The origin of endocardium, however, has been controversial: the endocardium may arise from the heart fields or vascular endothelial progenitors (Harris and Black, 2010; Vincent and Buckingham, 2010; Milgrom-Hoffman et al., 2011). The mesenchyme of cushions arises from two distinct origins. Endocardial cushions in the AVC and proximal OFT lumen derive their mesenchyme from the local endocardium that overlies the cushions (Eisenberg and Markwald, 1995), whereas the distal OFT cushions are populated by mesenchymal cells that migrate from the distant neural crest (Jiang et al., 2000).

Here, we review the interactions between these different progenitor cells and their derivatives that are essential for cardiac septation and valve development. We also highlight the key signaling pathways that are known to regulate cardiac septation and valve development.

### Cardiac chamber septation and valve formation

Septation of the primitive cardiac chambers, the AVC and the OFT is necessary for forming a four-chamber heart. The morphogenic events that direct cardiac septation and valve development are described below.

#### Atrioventricular septation

Four mesenchymal tissues are required for atrial and AVC septation: the superior and inferior atrioventricular (AV) endocardial cushions (atrioventricular cushions; see Glossary, Box 1), the mesenchymal cap (MC; see Glossary, Box 1), and the dorsal mesenchymal protrusion (DMP; see Glossary, Box 1) (Webb et al., 1998; Snarr et al., 2008) (Fig. 3). The AV cushions derive their mesenchyme from the endocardium through a cellular process called epithelial-to-mesenchymal transformation (EMT). During EMT, a subset of endocardial cells delaminates from the surface epithelium and transdifferentiates into mesenchymal cells, which migrate into the cardiac jelly and proliferate to cellularize the cushions (Eisenberg and Markwald, 1995). The MC, which envelops the growing edge of a muscular atrial septum, also arises

through EMT from the endocardium overlying the cap (Snarr et al., 2008). Conversely, the mesenchyme of DMP comes from the SHF, which gives rise to cells that migrate through the dorsal mesocardium and bulge into the atrial chamber as a mesenchymal protrusion (Snarr et al., 2007a; Snarr et al., 2008).

The mesenchyme of superior and inferior AV cushions fuses at the AV canal, dividing the canal into mitral and tricuspid orifices that form ventricular inlets (Fig. 2G, Fig. 3A,B). Meanwhile, a muscular septum (the primary atrial septum) grows from the atrial roof towards the AVC, with the MC at its leading edge. This muscular outgrowth partially septates the atrial chamber and leaves an opening (the ostium primum) between the MC and the AV canal (Fig. 2G). The MC then merges anteriorly with the AV cushions and posteriorly with the DMP to seal the ostium primum (Wessels et al., 1996; Schroeder et al., 2003; Wessels and Sedmera, 2003; Mommersteeg et al., 2006) (Fig. 3B,C). These mesenchymal tissues are later muscularized to form sturdy septum. While the ostium primum is closing, the upper margin of the primary atrial septum dissolves, creating a second opening (the ostium secundum) between the right and left atria. The ostium secundum is later sealed by a muscular septum (the secondary atrial septum), which is formed by part of the atrial roof that folds inward. The primary and secondary atrial septum then fuses to complete the septation of atrial chamber (Anderson et al., 2003a).

Within the ventricular chamber, an interventricular muscular septum emerges and grows superiorly to fuse with AV cushions, dividing the ventricular chamber into left and right ventricles (Fig. 2G, Fig. 3A) (Anderson et al., 2003a; Moorman et al., 2003). This muscular septum also connects with OFT cushions to separate the ventricular outlets. Abnormal chamber septation results in congenital heart diseases, including atrial septal defects (ASDs), ventricular septal defects (VSDs), and atrioventricular septal defects (AVSDs) (see Glossary, Box 1). These defects cause abnormal cardiac shunting and may lead to congestive heart failure (Brickner et al., 2000a).

#### Outflow tract septation

Septation of the cardiac OFT requires neural crest cells (NCCs) of neuroectodermal origin, as well as truncal and conal cushions situated in the distal and proximal OFT (Fig. 4A-C). Early in development, a group of NCCs delaminates from the neuroectodermal junction of rhombomeres 6-8 at the hindbrain (Kirby et al., 1983), traverses the pharyngeal arches and secondary heart field, and migrates into the distal OFT (Fig. 4A). The NCCs that reach the heart become the mesenchyme of truncal cushions (Fig. 4C). Subsequently, the mesenchymal truncal cushions (the right-superior and left-inferior cushions) fuse to form aortopulmonary septum, dividing the distal OFT into the aorta and pulmonary trunk (Jiang et al., 2000; Li et al., 2000) (Fig. 4D). By contrast, at the proximal OFT, the endocardium, through EMT, gives rise to the mesenchyme of conal cushions. The mesenchymal conal cushions (the right-posterior and left-anterior cushions) then merge to form a conal septum, separating the proximal OFT into the right and left ventricular outlets (Anderson et al., 2003b) (Fig. 4C,D). The ventricular outlets are aligned to the arteries by the connection of conal and truncal cushions and to the ventricles by the fusion of conal cushions with the interventricular septum. Misaligned or incomplete OFT septation leads to a variety of congenital heart defects, including overriding aorta (OA; see Glossary, Box 1), double-outlet right ventricle (DORV; see Glossary, Box 1), tetralogy of Fallot (TOF; see Glossary, Box 1), transposition of

**Box 1. Glossary**

**Atrial septal defect (ASD).** A congenital heart defect resulting from incomplete atrial septation.

**Atrioventricular canal (AVC).** The junction between developing atria and ventricles.

**Atrioventricular cushions.** The four endocardial cushions located at the AV canal: superior, inferior, left-lateral and right-lateral cushions.

**Atrioventricular septal defect (AVSD).** A congenital heart defect resulting from incomplete septation of the atrioventricular canal.

**Bicuspid aortic valve (BAV).** A congenital heart defect in which the aortic valve has only two cusps. The term BAV is also used broadly to describe any malformation of the aortic valve cusps.

**Dorsal mesenchymal protrusion (DMP).** A mesenchymal tissue that protrudes into the atrial chamber through the dorsal mesocardium.

**Double-outlet right ventricle (DORV).** A congenital heart defect in which both aorta and pulmonary trunk arise from the right ventricle.

**First heart field (FHF).** A population of mesodermal cells that form the cardiac crescent located in splanchnic mesoderm underlying the head folds. Progenitors of the FHF give rise to myocardium of the left ventricle, part of the right ventricle and part of the atria.

**Interruption of the aortic arch (IAA).** A congenital heart defect in which a segment of the aortic arch is occluded or absent.

**Mesenchymal cap (MC).** A mesenchymal tissue that caps the growing (inferior) edge of the primary atrial septum.

**Outflow tract (OFT).** The outflow region of the embryonic heart that develops into the left and right ventricular outlets, as well as the aorta and pulmonary trunk.

**Overriding aorta (OA).** A congenital heart defect in which the aortic root connects with both the left and right ventricle and receives blood from both ventricles.

**Patent ductus arteriosus (PDA).** A congenital heart defect in which the ductus arteriosus fails to close after birth.

**Persistent truncus arteriosus (PTA).** A congenital heart defect in which the aorta fails to separate from the pulmonary trunk, resulting in a single arterial trunk that emerges from the ventricles.

**Pulmonary stenosis (PS).** A congenital heart defect in which the pulmonary valve is malformed, causing narrowing of the pulmonary trunk and hindrance of blood flow.

**Secondary heart field (SHF).** A population of mesodermal cells located medially and posteriorly to the first heart field, then behind the heart tube, and extending into pharyngeal mesoderm as the embryo develops. Progenitor cells of the SHF give rise to myocardium of the right ventricle, cardiac outflow tract, and part of the left ventricle and atria.

**Tetralogy of Fallot (TOF).** A congenital heart defect characterized by right ventricular outflow tract obstruction, right ventricular hypertrophy, ventricular septal defect and overriding aorta.

**Total or partial anomalous pulmonary venous return (TAPVR or PAPVR).** A congenital heart defect in which pulmonary veins are misconnected and drained into the systemic venous circulation.

**Transposition of the great arteries (TGA).** A congenital heart defect in which the right ventricle connects to the aorta, and the left ventricle connects to the pulmonary trunk.

**Tricuspid atresia (TA).** A congenital heart defect in which the tricuspid valve is missing, hence blocking the blood flow from right atrium to right ventricle.

**Ventricular septal defect (VSD).** A congenital heart defect resulting from incomplete ventricular septation

great arteries (TGA; see Glossary, Box 1) and persistent truncus arteriosus (PTA; see Glossary, Box 1) (Brickner et al., 2000b). These defects can cause mixing of arterial with venous blood, leading to cyanosis and/or heart failure.

**Atrioventricular and semilunar valve development**

Heart valves develop at endocardial cushions of the AVC and OFT. Valve morphogenesis begins with the transformation of endocardial cells into mesenchymal cells through EMT (Fig. 5). Endocardial cushions with mesenchymal cells then elongate and remodel themselves to form primitive valves that gradually mature into thin valve leaflets. The elongation of valve leaflets is accomplished by a combination of cell proliferation at the growing edge and apoptosis at the base of the cushion (Hurle et al., 1980).

The mitral and tricuspid (atrioventricular) valves originate from AV endocardial cushions. The fusion and remodeling of superior and inferior AV cushions, while dividing the AVC, gives rise to the anterior mitral leaflet and the septal tricuspid leaflet (de Lange et al., 2004) (Fig. 6A,B). The left lateral AV cushion becomes the posterior mitral leaflet, whereas the right lateral cushion produces the anterior and posterior tricuspid leaflets. Failure of the superior and inferior cushions to fuse causes a cleft in the anterior mitral leaflet, resulting in leaky 'cleft mitral valve', a disease encountered in patients with Down syndrome (Fraisie et al., 2003). Tricuspid valve malformations also cause human disease, such as the Ebstein's anomaly: the septal and often the posterior tricuspid leaflets are displaced into the right ventricle with the anterior leaflet becoming excessively large, thus causing tricuspid valve regurgitation or stenosis (see Glossary, Box 1) (Brickner et al., 2000b).

The aortic and pulmonic (semilunar) valves arise from the conotruncal and intercalated cushions at the OFT. The conotruncal cushions give rise to the right and left leaflets of semilunar valves (Fig. 4C, Fig. 6A,B) (Restivo et al., 2006; Okamoto et al., 2010). Conal cushions, capable of supporting EMT of the endocardium, probably have major contributions to the aforementioned valve leaflets, of which the mesenchymal tissues largely come from the endocardium (de Lange et al., 2004). Adjacent to the conotruncal cushions are two other distinct cushions – the right-posterior and the left-anterior intercalated cushions – that develop respectively into the posterior aortic and the anterior pulmonic leaflets (Fig. 4C, Fig. 6A,B) (Anderson et al., 2003b; Restivo et al., 2006). These semilunar valve leaflets also derive their mesenchyme primarily from the endocardium (de Lange et al., 2004). Semilunar valve malformations are common and occur in 2-3% of the population, causing valve regurgitation and/or stenosis (Brickner et al., 2000a).

**Similarities between AVC and OFT septation**

Morphogenesis of the AV and OFT cushions is similar. The analogous roles of these cushions in cardiac septation and valve formation are better appreciated by rotating the OFT 90° counter-clockwise to superimpose the corresponding OFT and AV cushions (Fig. 6A). The superior and inferior AV cushions fuse to divide the AVC, forming valve leaflets that flank the AVC septation site; comparably, the right-superior and left-inferior conal cushions merge to separate the OFT, bringing about valve leaflets that border the OFT septation (Fig. 6A,B). Conversely, the lateral AV cushions are similar in function to the intercalated OFT cushions in that they both lack direct contributions to AV/OFT septation and that they form valve leaflets that oppose the AV/OFT septation site (Fig. 6A,B). The AVC and OFT, therefore, have evolved similar strategies for lumen septation and valve formation, sharing many essential developmental genes and pathways (Fig. 7).



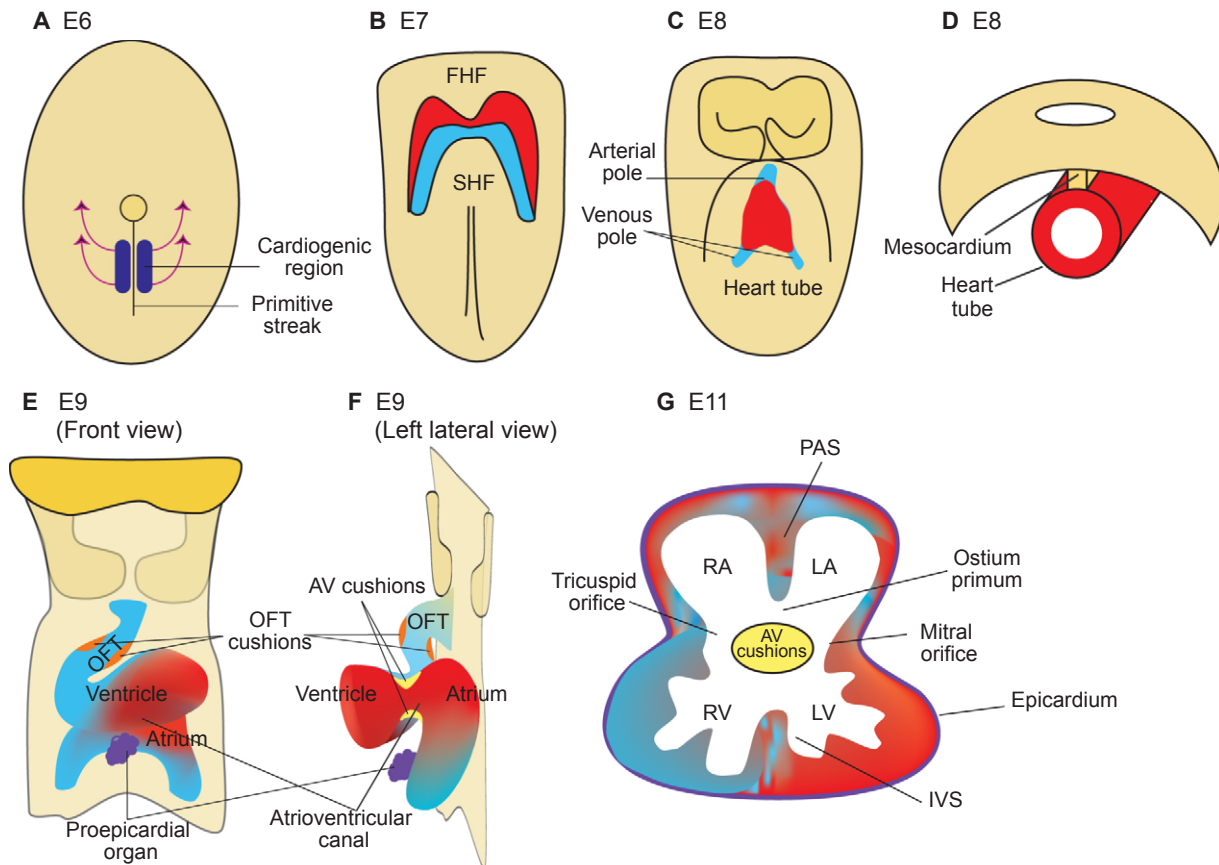

**Fig. 2. The formation of a mouse heart.** (A) Ventral view of a mouse embryo at E6. The heart originates from mesodermal cells in the primitive streak. During gastrulation, mesodermal cardiac progenitor cells migrate to the splanchnic mesoderm to form the cardiac crescent. (B) Ventral view at E7. One subset of cardiac progenitors forms a horseshoe-shaped cardiac crescent (the first heart field, FHF; red). Another subset of cardiac progenitor cells forms the secondary heart field (SHF; blue), which is located posteriorly and medially to the FHF. (C) Ventral view at E8. Cells in the FHF merge in the midline to form the heart tube, which then elongates on both arterial and venous poles via the addition of progenitor cells from the SHF. (D) Transverse section at E8. The developing heart tube is suspended from the body wall by the dorsal mesocardium, which later dissolves except at the poles of heart tube, allowing the tube to loop rightward. (E,F) Ventral (E) and left lateral (F) views at E9. The looped heart tube contains four anatomical segments: atrium, atrioventricular canal, ventricle and outflow tract (OFT). Within the AVC and OFT, AV cushions (yellow) and OFT cushions (orange) develop. The proepicardial organ (purple) houses epicardial progenitors that later migrate to the heart and give rise to the epicardium. (G) Transverse section at E11. At this stage, the heart is partially partitioned by the primitive atrial septum (PAS), interventricular septum (IVS) and atrioventricular cushions (AV cushions) into a prototypic four-chamber heart. The AVC is divided into tricuspid and mitral orifices, forming ventricular inlets that connect the respective atrium to the ventricle. The opening between the PAS and AVC is the ostium primum. RA, right atrium; LA, left atrium; RV, right ventricle; LV, left ventricle.

### Cell lineages that contribute to septum formation and valve development

The endocardium, secondary heart field and neural crest contribute progenitor cells that give rise to septal tissues or valve leaflets. Besides direct lineage contributions, these progenitor cells of different origins interact with each other and with other cells in the heart to orchestrate cardiac septation and valve development.

#### Endocardium and EMT

EMT of the endocardium occurs only in the endocardial cushions and is regulated by many signaling factors secreted by the myocardium underlying the cushion. These EMT-regulating factors include bone morphogenetic proteins 2 and 4 (Bmp2, Bmp4), transforming growth factor $\beta$  2 and 3 (TGF $\beta$ 2, TGF $\beta$ 3) and vascular endothelial growth factor (Vegf) (Fig. 7; Tables 1, 2). To react to myocardial signals and begin EMT, the endocardium at the cushion expresses receptors and effectors downstream of the myocardial signaling pathways, including Alk2 (Acvr1), Alk3

(Bmpr1a), Alk5 (Tgfr1), Vegf-R, Notch1 and  $\beta$ -catenin. Different from the chamber myocardium, the myocardium at the cushion is specified and programmed by genes, such as *Tbx2*, *Bmp2*, *Nfatc2*, *Nfatc3* and *Nfatc4*, to suppress chamber-specific gene expression, produce EMT-regulating molecules, and deposit extracellular matrix to support EMT (Abedin et al., 2004; Chang, C. P. et al., 2004; Christoffels et al., 2004; Rivera-Feliciano and Tabin, 2006; Shirai et al., 2009). The endocardium at the cushion is also different from that in the cardiac chamber: the cushion endocardium expresses genes essential for septal and valvular development, such as those encoding Nfatc1 and Vegf receptors, in a temporal pattern different from that of the chamber endocardium (Chang, C. P. et al., 2004; Stankunas et al., 2010). Such distinct gene programming and disparate arrays of signaling factors and receptors at the endocardial cushion determines the regional specificity of EMT. Much less is known about the post-EMT events at the endocardial cushion: for example, how mesenchymal cells control the remodeling of valvular and septal tissues. Future efforts

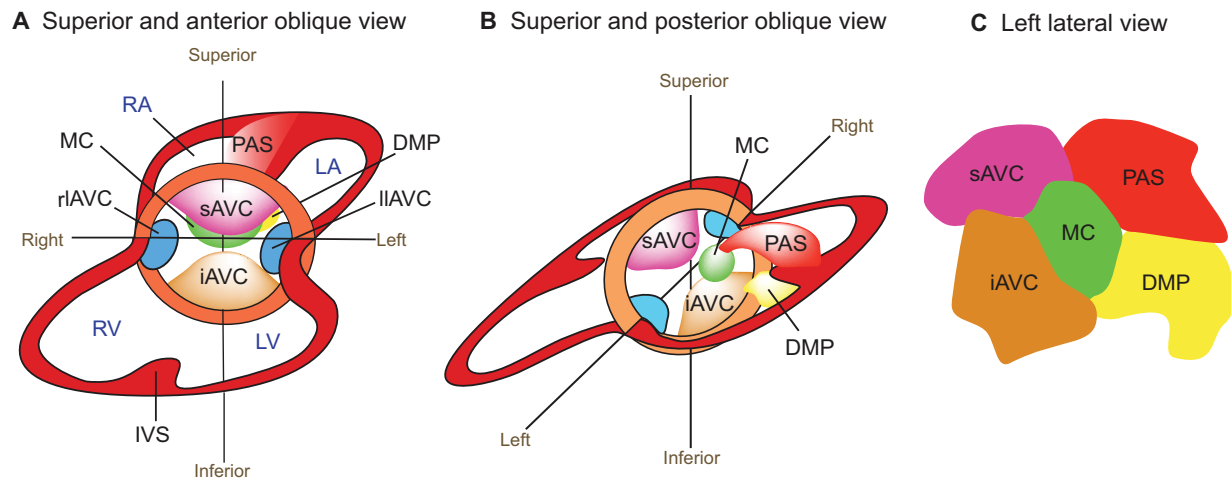

**Fig. 3. Endocardial cushion development.** (A,B) Superior and anterior oblique view (A) and superior and posterior oblique view (B) of the heart. The superior and inferior atrioventricular cushions (sAVC and iAVC) are the two major cushions that develop in the central portion of the AVC. Two minor cushions, left and right lateral AV cushions (lIAVC and rIAVC), form laterally at the AVC. The mesenchymal cap (MC) is a tissue that caps the leading edge of primary atrial septum (PAS) that grows from the atrial roof towards the AV canal. The dorsal mesenchymal protrusion (DMP) protrudes from the dorsal mesocardium into the atrial chamber. RA, right atrium; LA, left atrium; RV, right ventricle; LV, left ventricle; IVS, interventricular septum. (C) The composition of the atrial septum (left lateral view).

to generate inducible and/or tissue-specific knockout mouse lines that specifically target cushion mesenchymal cells independent of their endocardial precursors will facilitate the investigation of post-EMT remodeling events at the cushion.

### The secondary heart field

The SHF progenitor cells contribute to cardiac septation and valve development. SHF progenitors give rise to the DMP mesenchyme, which merges with AV cushions and becomes part of the atrial septum (Snarr et al., 2007b). SHF progenitors also give rise to the OFT myocardium (Verzi et al., 2005), which secretes signaling molecules that stimulate the conal endocardium to undergo EMT, an essential step for later development of the ventricular outlet septum and semilunar valve leaflets (Anderson et al., 2003b; de Lange et al., 2004). Besides promoting EMT, the SHF-derived OFT myocardium secretes chemotactic molecules, such as Sema3c, to attract NCCs into the OFT to form the aortopulmonary septum (Brown et al., 2001; Feiner et al., 2001; Toyofuku et al., 2008). Furthermore, at the base of the aorta and pulmonary trunk, the SHF gives rise to vascular smooth muscle cells (Cai et al., 2003; Verzi et al., 2005) to support the separation of these arteries from ventricular outlets.

Disruption of many signaling pathways in the SHF, using *Mef2c*- or *Islet1-Cre* lines (Cai et al., 2003; Verzi et al., 2005), results in abnormalities in OFT septation or semilunar valves. These pathways include *Wnt/β-catenin*, *BMP* (*Bmp4*, *Bmpr1a*), *Fgf8*, *Notch*, *Hedgehog/Smoothed*, and *calcineurin/Nfat1* signaling (Fig. 7, Tables 1, 2). One major issue yet to be resolved is the actual action site(s) of these ‘SHF pathways’, i.e. whether they operate within the SHF or within SHF-derived tissues. Because of the overlap of many of the ‘SHF’ pathways with those functioning in cardiac tissues that are essential for EMT and cushion development, the outcomes of genetic manipulation in the SHF should be carefully interpreted and, in most cases, require further investigations. Nevertheless, calcineurin and Notch are known to operate in SHF progenitors to control OFT development. Deletion of calcineurin b1 (*Cnbl*; *Ppp3r1* – Mouse Genome Informatics) in SHF progenitors causes cell apoptosis and

regression of conal cushions, resulting in absent semilunar valves (Lin et al., 2012). Conversely, *Cnbl* deletion in the OFT myocardium does not cause semilunar valve defects (Lin et al., 2012), thus localizing the site of calcineurin action to SHF progenitors for semilunar valve development. Likewise, inhibition of the Notch pathway in SHF progenitors causes OFT septation defects (such as DORV and PTA), but a later inhibition of Notch in the myocardium does not produce such defects (High et al., 2007; High et al., 2009).

Besides OFT development, AV septation requires signaling in SHF progenitors. Embryos lacking Hedgehog signaling in SHF progenitors, but not those lacking Hedgehog signaling in the myocardium or endocardium, show AV septal defects and a failure of the SHF-derived DMP mesenchyme to protrude into the atrial chamber (Goddeeris et al., 2008). Signaling within the SHF progenitors before they differentiate into cardiac cells, therefore, is essential for both AV and OFT septation. Further studies will be needed to elucidate how SHF signaling specifies developmental functions of SHF-derived tissues and how SHF progenitors modulate the activities of NCCs as the latter cells traverse the SHF during their migration to the heart.

### Neural crest cell lineage

Cardiac NCCs migrate from their original location in the hindbrain (rhombomeres 6-8) to the pharyngeal arches and then to the heart to form the aortopulmonary septum (Kirby et al., 1983). Migrating NCCs actively exchange signals with surrounding tissues, such as the pharyngeal arch and the OFT myocardium. The pharyngeal arch endothelium, through its endothelin-converting enzyme-1 (*Ece1*), produces the signaling molecule endothelin-1, which activates the endothelin receptor A on NCCs to modulate NCC activities for pharyngeal arch artery (PAA) and OFT development. Embryos lacking *Ece1* or endothelin receptor A develop PAA defects, as well as septation defects such as VSD, OA, DORV, PTA or TGA (Clouthier et al., 1998; Yanagisawa et al., 1998a). The OFT myocardium secretes *Sema3c* (ligand) to attract NCCs, which express *Plxn2* (receptor), and promotes them to migrate into the

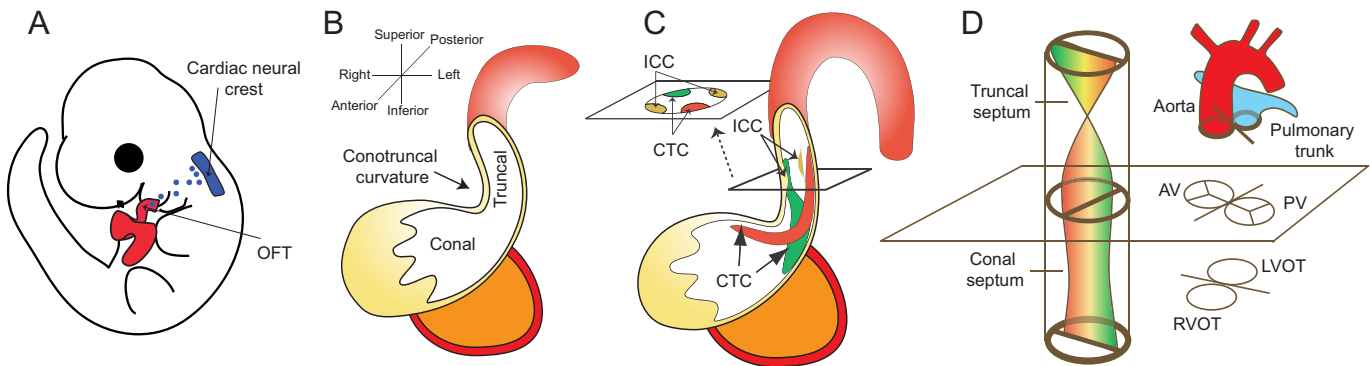

**Fig. 4. Septation of the cardiac outflow tract.** (A) Left lateral view of an E10 mouse embryo. The neural crest at rhombomere 6-8 gives rise to cells (blue) that migrate to and colonize the distal cardiac outflow tract (OFT). (B) The cardiac OFT contains conal (proximal) and truncal (distal) cushions. The boundary between the conal and truncal cushions is marked by an outer curvature of the OFT (the conotruncal curvature). (C) The conotruncal cushions (CTCs) and intercalated cushions (ICCs) develop within the OFT. These cushions occupy four quadrants of the OFT (shown in cross-section). The conotruncal cushions fuse to septate the OFT, as shown in D. (D) Fusion of the conotruncal cushions forms a spiral septum, the truncal part of which divides the OFT into aorta and pulmonary trunk, whereas the conal part septates the OFT into left and right ventricular outlets (LVOT, RVOT). The aortic valves (AV) and pulmonic valves (PV) develop at the conotruncal junction.

OFT, where NCCs become the mesenchyme of truncal cushions. The truncal mesenchyme then fuses and differentiates to form a smooth muscle septum (aortopulmonary septum) that divides the aorta and pulmonary trunk. Knockout of *Plxna2* or *Sema3c* in mice impairs the migration of NCCs, leading to PAA defects and PTA (Brown et al., 2001; Feiner et al., 2001; Toyofuku et al., 2008).

Many other signaling pathways are necessary for NCCs to regulate OFT septation, including the Wnt/ $\beta$ -catenin-Pitx2, Notch, TGF (Alk5), BMP (Alk2) and Hedgehog pathways (Fig. 7, Tables 1, 2). In contrast to the crucial roles of NCCs in OFT septation, most data suggest that NCCs do not have significant contribution to AV cushion development (Combs and Yutzey, 2009).

### Molecular pathways that regulate septation and valve development

Many mouse genetic models have been established to demonstrate the function of genes involved in cardiac septation and valve

development (Fig. 7). These include genes that encode signaling molecules (Tables 1, 2), transcription factors (Table 3), chromatin or epigenetic regulators (Table 4), and cell adhesion/migration molecules (Table 4). Discussed below are some of the most well characterized pathways that are known to regulate cardiac septation and valve development.

### TGF, BMP and SMAD pathways

TGF $\beta$ s were among the first signaling molecules to be implicated in the initiation of EMT (Brown et al., 1996; Ramsdell and Markwald, 1997; Boyer et al., 1999; Brown et al., 1999; Boyer and Runyan, 2001), and multiple TGF $\beta$  isoforms are expressed in the endocardial cushions of mouse embryos (Akhurst et al., 1990; Millan et al., 1991). These mammalian TGF $\beta$  isoforms are highly redundant; disruption of multiple TGF $\beta$  ligands is often necessary to uncover their roles in heart development (Shull et al., 1992; Kaartinen et al., 1995; Sanford et al., 1997; Dünker and

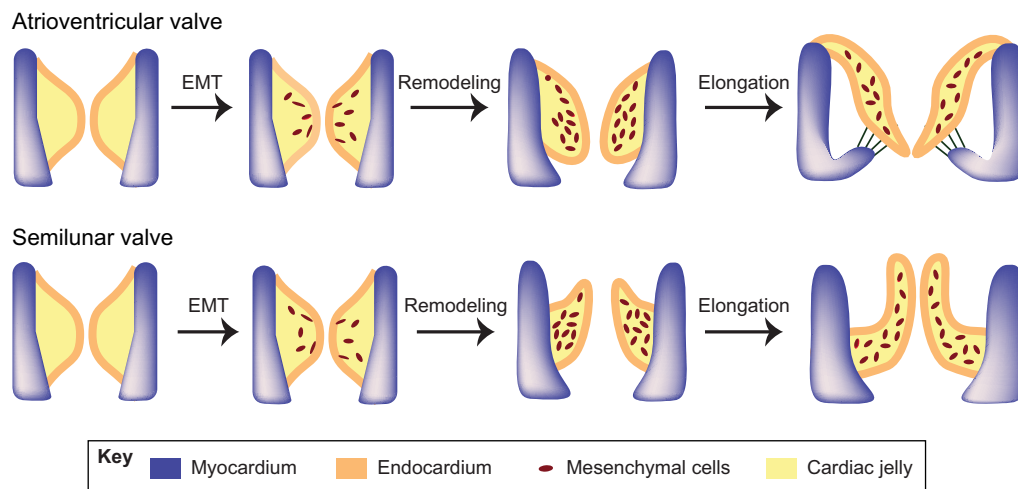

**Fig. 5. Epithelial-to-mesenchymal transformation and valve elongation.** Endocardial cells in the AV cushions and conal cushions undergo epithelial-to-mesenchymal transformation (EMT) and generate mesenchymal cells that populate the cushions. The mesenchymal cushions then remodel and elongate themselves to form primitive valves that mature into thin valve leaflets (shown here for the atrioventricular valves and the semilunar valves).

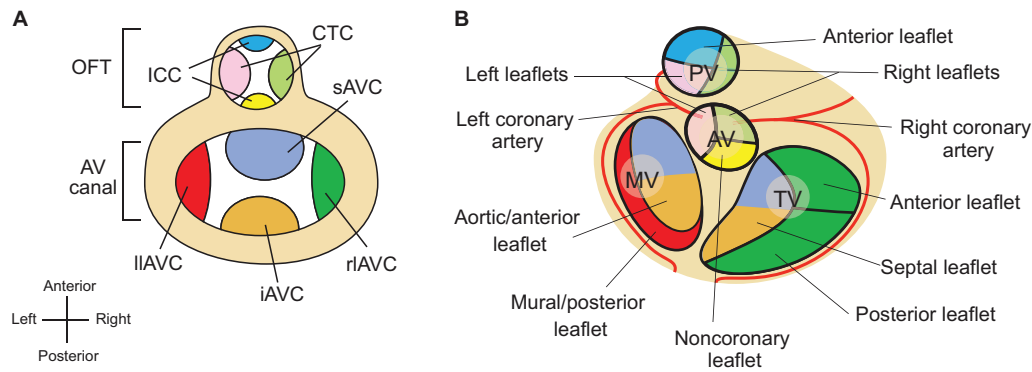

**Fig. 6. Endocardial cushions and heart valve leaflets.** (A) Schematic of endocardial cushions in the atrioventricular (AV) canal and the outflow tract (OFT). The figure is a superior view of the heart with atria removed. The cushions are color coded to correspond to their derived valve leaflets illustrated in B. CTC: conotruncal cushions; ICC: intercalated cushions; sAVC: superior AV cushion; iAVC: inferior AV cushion; rIAVC: right lateral AV cushion; lIAVC: left lateral AV cushion. (B) Schematic (superior view) of atrioventricular and semilunar valve leaflets that develop from the corresponding cushions color coded in A. PV, pulmonary valve; AV, aortic valve; TV, tricuspid valve; MV, mitral valve.

Kriegelstein, 2002). Regardless of the redundancy, *Tgfb2* is known to function downstream of the *Notch1*, *Bmp2* and *Tbx2* pathways to activate *Wnt*/ $\beta$ -catenin signaling to promote EMT (Liebner et al., 2004; Timmerman et al., 2004; Shirai et al., 2009; Luna-Zurita et al., 2010).

BMPs have diverse roles in valve development and cardiac septation. Myocardial *Bmp2* activates the expression of *Has2* (hyaluronic acid synthetase 2) to produce the cushion extracellular matrix that is required for EMT (Rivera-Feliciano and Tabin, 2006). Also, myocardial *Bmp2* signals the endocardial *Bmp* type 1A receptor (*Bmpr1a*) to induce the expression of *Twist1*, *Msx1* and *Msx2*, which are essential for EMT (Ma et al., 2005). *Bmp4* in the myocardium is necessary for cardiac septation. Absence of myocardial *Bmp4* leads to ASD, VSD and PTA (Jiao et al., 2003; Liu et al., 2004; McCulley et al., 2008). *Bmp6* and *Bmp7*, expressed in the myocardium and cushion/valve mesenchyme, are functionally redundant; mice with double knockout of these genes display hypocellular OFT cushions (Kim et al., 2001). *Bmpr2*, a receptor for *Bmp2*, *Bmp4* and *Bmp7*, has different spatial roles. Mice with hypomorphic alleles of *Bmpr2* exhibit interruption of the aortic arch (IAA; see Glossary, Box 1), PTA, and absent semilunar valves (Délot et al., 2003). *Bmpr2* disruption in endothelial cells causes ASD, VSD, and hyperplastic semilunar and AV valve leaflets, whereas *Bmpr2* deletion in myocardial cells or in NCCs leads to DORV or OA (Beppu et al., 2009).

SMAD proteins that transduce or modulate TGF/BMP signals are also essential for cardiac septation and valve formation. Loss of *Smad4*, the most common SMAD, in NCCs results in pharyngeal arch artery defects, OFT cushion hypoplasia and PTA (Jia et al., 2007). *Smad4*-null NCCs have increased apoptosis and reduced presence in the OFT, accompanied by a reduction in the *Bmp4*, *Sema3c* and *Plxn2* signals that are necessary for OFT septation. By contrast, disruption of *Smad6*, which inhibits BMP signaling, causes hyperplasia of the AV and OFT cushions, leading to hyperplastic valves (Galvin et al., 2000).

### Notch signaling

Notch signaling is necessary for EMT (Niessen and Karsan, 2008; MacGrogan et al., 2010), and mutation of *Notch1* or its nuclear effector *Rbpjk* (*Rbpj* – Mouse Genome Informatics) causes EMT failure (Timmerman et al., 2004). Endocardial *Notch1* induces the

expression of *Tgfb2* to activate the expression of *Snail1* (*Snai1*) and *Snail2* (*Snai2*), which repress VE-cadherin expression and hence disrupt cell-cell contact, allowing EMT to occur (Romano and Runyan, 2000; Timmerman et al., 2004; Luna-Zurita et al., 2010). EMT of the *Notch1*/*Tgfb2*-primed endocardial cells requires myocardial *Bmp2*, the expression of which, however, is repressed by myocardial *Notch1* (Luna-Zurita et al., 2010). These seemingly opposing effects of endocardial and myocardial Notch signaling suggest a complex tissue-specific role for Notch in orchestrating EMT of AV cushions.

In the SHF, inhibition of Notch decreases *Fgf8* expression, reduces EMT of OFT cushions, and impairs NCC migration with consequent thickened, unequally sized semilunar valve leaflets (High et al., 2009; Jain et al., 2011). Such an EMT defect is rescued by exogenous *Fgf8*, suggesting that Notch functions through *Fgf8* to activate EMT of OFT cushions (High et al., 2009). *NOTCH1* mutations are observed in some families with a multi-generation history of BAV and/or calcific aortic stenosis (Garg et al., 2005; Garg, 2006; McKellar et al., 2007; McBride et al., 2008; Rusanescu et al., 2008). Because *Notch1* is capable of suppressing *Runx2*, which promotes calcification (Garg et al., 2005), *NOTCH1* mutations in humans might cause *RUNX2* upregulation with consequent valve calcification.

Disruption of the SHF Notch in mice also causes septation defects, including ASD, VSD, DORV and PTA (High et al., 2009). In humans, *JAG1* or *NOTCH2* mutations are associated with Alagille syndrome (McDaniell et al., 2006; Warthen et al., 2006), an autosomal dominant disorder with abnormalities in multiple organs, including pulmonary stenosis and TOF. The Alagille heart phenotypes of pulmonary stenosis and TOF also occur in mice lacking *Hey2*, a Notch downstream target gene (Donovan et al., 2002).

### The Wnt pathway

*Wnt*/ $\beta$ -catenin signaling plays a major role in EMT and cardiac septation. For AV cushion development,  $\beta$ -catenin functions downstream of *Tgfb2* in the endocardium to promote EMT of AV cushions (Liebner et al., 2004). *Wnt2* also signals through  $\beta$ -catenin to recruit SHF-derived mesenchymal cells into DMP. Mice lacking *Wnt2* or  $\beta$ -catenin in the SHF have reduced DMP mesenchyme, resulting in ASD and VSD (Lin et al., 2007; Tian et



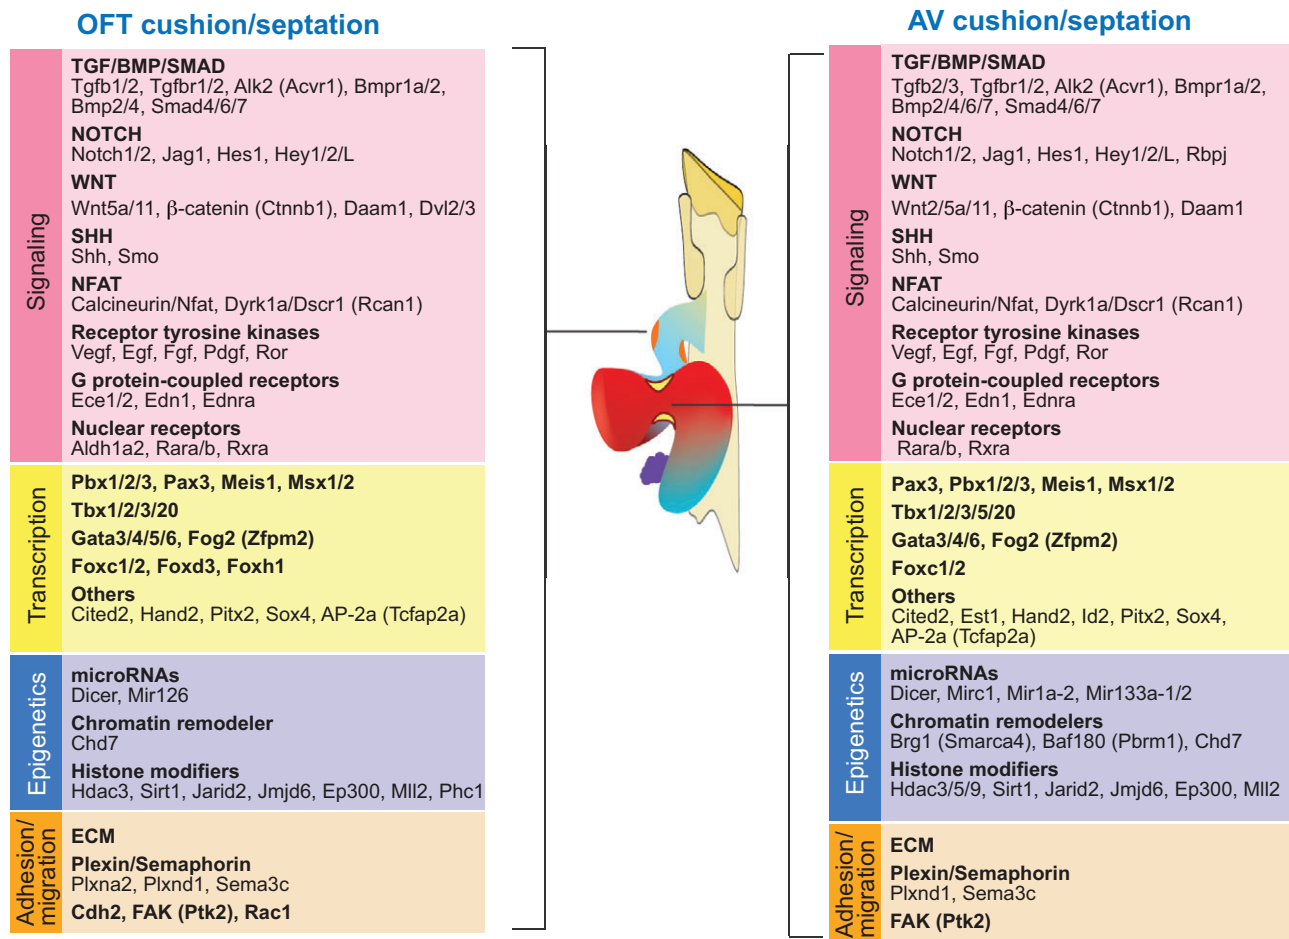

**Fig. 7. Genes and pathways essential for cardiac septation and valve development.** Cushion and valve development, and hence septation, in the outflow tract (OFT) and the atrioventricular (AV) canal require similar molecular pathways. Factors required include those involved in signaling, transcription, epigenetics and cell adhesion/migration.

al., 2010). For OFT development,  $\beta$ -catenin has crucial roles in the SHF and in NCCs. In the SHF,  $\beta$ -catenin is essential to prevent the development of abnormal pharyngeal arteries and PTA (Lin et al., 2007). In NCCs, Wnt/ $\beta$ -catenin functions through Pitx2 to control OFT septation. Migrating NCCs that lack  $\beta$ -catenin show reduced expression of Pitx2, disruption of which results in failure of NCC migration into the OFT, causing PTA, DORV or TGA (Kioussi et al., 2002).

The noncanonical Wnts, although not signaling through  $\beta$ -catenin, are also essential for OFT septation; mice lacking Wnt5a or Wnt11 display TGA, DORV or PTA (Schleiffarth et al., 2007; Zhou et al., 2007).

### Epidermal growth factor signaling

Epidermal growth factor (EGF) signaling is essential for AV and OFT development. EGF signaling between endocardial HB-EGF (Hbegf; ligand) and myocardial ErbB1 (Egfr; an EGF receptor), for example, suppresses cushion development. Mutations affecting HB-EGF, an endocardial ligand that directly binds ErbB1 and ErbB4, result in hyperproliferation of cushion mesenchymal cells and hyperplasia of AV and semilunar valves (Iwamoto et al., 2003; Jackson et al., 2003). Similar cushion and semilunar valve hyperplasia is observed in mice with mutations in ErbB1, which is present primarily in the myocardium (Chen et al., 2000; Jackson et

al., 2003; Sibilina et al., 2003). In contrast to myocardial ErbB1 signaling, ErbB2- or ErbB4-based signaling in the myocardium does not seem necessary for early cushion development. Mutations in ErbB2 or ErbB4, both present in the myocardium, have no apparent cushion defects at embryonic day (E) 10.5 before the mutant embryos die at E10-11 of severe hypotrabeulation (Gassmann et al., 1995; Lee et al., 1995).

EGF signaling within the mesenchyme promotes cushion development. Mutations in ErbB3, an EGF receptor present in the cushion mesenchyme (Meyer and Birchmeier, 1995), causes hypoplastic endocardial cushions (Erickson et al., 1997). Such mesenchymal ErbB3 signaling might be activated by endocardial Neuregulin 1 (Nrg1), which is a ligand that directly binds ErbB3 and ErbB4, because Nrg1 mutations, like ErbB3 mutations, cause cushion hypoplasia (Meyer and Birchmeier, 1995). The opposing effects of HB-EGF/ErbB1 and Nrg1/ErbB3 on the development of cushion mesenchyme suggest that a balance of signaling through ErbB1 and ErbB3 is essential to determine the extent of cushion and valve formation.

Tyrosine phosphorylation and activation of ErbB receptors is modulated by protein tyrosine phosphatases, including the phosphatase Shp2 encoded by *Ptpn11* (Neel et al., 2003). *PTPN11* mutations are associated with Noonan syndrome, which is characterized by short stature, facial abnormalities,



myeloproliferative disease and heart malformations. The spectrum of heart defects in Noonan syndrome includes dysplastic/stenotic pulmonary valves, bicuspid/stenotic aortic valves, ASD or AVSD, and TOF (Tartaglia et al., 2001; Romano et al., 2010). Cardiac defects consistent with Noonan syndrome are present in mice bearing a *Ptpn11* point mutation (D61G) and exhibiting hyperplastic cushions and large valves, AVSD and DORV (Araki et al., 2004). The *Ptpn11* (D61G) mutation, possibly through activating ErbB/Erk, functions in the endocardium to enhance EMT and cause valve hyperplasia (Araki et al., 2009).

### Calcineurin/NFAT signaling

The two distinct phases of valve development, EMT and valve elongation, are organized by sequential waves of nuclear factor of activated T cells (NFAT) signaling (Chang, C. P. et al., 2004). Myocardial *Nfat2*, *Nfat3* and *Nfat4* first trigger EMT of the AV cushions by repressing the expression of a potent EMT inhibitor, VEGF-A. Subsequent to EMT, a second wave of NFAT signaling, directed by calcineurin and *Nfat1*, occurs in the endocardium to promote valve remodeling and elongation. However, the mechanisms that control the transition from EMT to valve elongation phase are not entirely clear. The phase transition is likely to be facilitated by VEGF-A, which is upregulated along with *Vegf-R2* (Kdr – Mouse Genome Informatics) at the transition window to terminate EMT (Dor et al., 2001; Dor et al., 2003; Chang, C. P. et al., 2004) as well as to help initiate AV valve elongation (Stankunas et al., 2010).

In the endocardium, calcineurin triggers the entry of *Nfat1* into the nucleus to activate target genes essential for valve elongation (de la Pompa et al., 1998; Ranger et al., 1998; Chang et al., Chang, C. P. et al., 2004; Wu et al., 2007; Zeini et al., 2009). Furthermore, to support the endocardial growth required for valve elongation, a subpopulation of *Nfat1*-expressing endocardial cells does not undergo EMT but remains as a proliferative cell population (Wu et al., 2011). In the OFT, *Nfat1* keeps EMT of conal cushions in check to prevent excessive EMT and invasion of EMT-derived mesenchymal cells into truncal cushions that are occupied by NCC-derived mesenchyme (Wu et al., 2011). *Nfat1* thus delineates a boundary between EMT- and NCC-derived mesenchyme at the conotruncal junction, where the semilunar valves develop. Besides functioning in the endocardium, calcineurin-*Nfat1* signals in the SHF to maintain conal cushion development (Lin et al., 2012). Without SHF calcineurin or *Nfat1*, the conal cushion mesenchyme displays enhanced apoptosis, resulting in failure of semilunar valve formation.

Calcineurin-NFAT signaling is counteracted by *Dscr1* (Down syndrome critical region 1) and *Dyrk1a* (dual specificity tyrosine-phosphorylation-regulated kinase 1A). *Dscr1* inhibits calcineurin activity to prevent nuclear entry of NFAT, whereas *Dyrk1a* promotes nuclear export of NFAT (Arron et al., 2006). *Dscr1* and *Dyrk1a* thus synergistically inhibit NFAT signaling. The triplication of *DSCR1* (RCAN1 – Human Gene Nomenclature Database) and *DYRK1A* genes in Trisomy 21 (Down syndrome) might, therefore, attenuate calcineurin-NFAT signals in multiple developmental tissues, leading to the endocardial cushion and valve defects, as well as other developmental phenotypes, associated with Down syndrome (Lange et al., 2004; Arron et al., 2006; Wu et al., 2007).

### VEGF signaling

Regulation of valve development by VEGF signaling is a complex process. VEGF-A can function as an inhibitor of EMT (Dor et al., 2001; Dor et al., 2003; Chang, C. P. et al., 2004), a growth factor

for endothelial/endocardial cell proliferation (Fong et al., 1995; Shalaby et al., 1995; Olsson et al., 2006), and a promoter for valve elongation (Stankunas et al., 2010). Moreover, the expression of VEGF receptors is dynamically regulated during valve development (Stankunas et al., 2010). VEGF receptor 1 (*Vegf-R1*; *Flt1* – Mouse Genome Informatics) is highly expressed in the early cushion endocardium, but its expression subsides after EMT, whereas VEGF receptor 2 (*Vegf-R2*) does not exhibit robust expression in the cushion endocardium until after EMT is complete. This distinct spatiotemporal expression of VEGF receptors correlates with their function in valve development. *Vegf-R1* is essential for EMT of OFT cushions, whereas *Vegf-R2* is required primarily for the elongation of AV valves after EMT (Stankunas et al., 2010).

### Pax3, Pbx and Meis

*Pax3* is a paired homeodomain transcription factor required for OFT septation (Epstein et al., 1991; Epstein, 1996; Conway et al., 1997). *Pax3* is transiently expressed in premigratory NCCs and is quickly turned off before the emigration of those cells (Epstein et al., 2000; Chang et al., 2008). Deletion of *Pax3* in early NCCs causes OFT septation defects (such as PTA), whereas a later deletion of *Pax3* in NCCs has no influence on OFT development (Olaopa et al., 2011). *Pax3* thus functions within a short window to program NCCs for OFT septation.

The short burst of *Pax3* in NCCs is absent in mice lacking *Pbx1*, a TALE homeodomain transcription factor (Chang et al., 2008). *Pbx1*-null embryos exhibit pharyngeal arch artery defects, VSD and PTA, accompanied by an absence of *Pax3* expression and upregulation of *Msx2* in premigratory NCCs (Chang et al., 2008). *Msx2* encodes a homeodomain transcription factor and is repressed by *Pax3* in NCCs to maintain OFT development (Kwang et al., 2002). *Pax3*, by contrast, is a direct transcriptional target of *Pbx1* and *Pbx*'s co-factors – the *Hox* and *Meis* homeodomain proteins (Chang et al., 1995; Chang et al., 1997; Chang et al., 2008). Both *Hox* and *Meis* are required for heart development. *Hoxa3* knockout mice exhibit pharyngeal arch artery defects (such as patent ductus arteriosus; see Glossary, Box 1) and possible pulmonic stenosis (Chisaka and Capecchi, 1991), whereas *Meis1*-null mice show overriding aorta with VSD (Stankunas et al., 2008). The transcriptional cascade *Pbx/Hox/Meis-Pax3-Msx2*, composed of five different classes of homeodomain proteins, is therefore essential to program NCCs for the development of OFT.

*Pbx1*, the major *Pbx* gene, cooperates with two minor *Pbx* genes (*Pbx2* and *Pbx3*) to control OFT development (Chang et al., 2008; Stankunas et al., 2008). Mice with compound *Pbx* mutations develop a spectrum of OFT malformations, with the exact type of abnormalities determined by the *Pbx* genotype (Chang et al., 2008; Stankunas et al., 2008). The triple heterozygous mice (*Pbx1*<sup>+/-</sup>;*2*<sup>+/-</sup>;*3*<sup>+/-</sup>) have isolated BAV, whereas *Pbx1*<sup>+/-</sup>;*2*<sup>-/-</sup> mice display overriding aorta with BAV. By contrast, *Pbx1*<sup>+/-</sup>;*2*<sup>-/-</sup>;*3*<sup>+/-</sup> mice have TOF with small, malformed semilunar valves, yet *Pbx1*<sup>-/-</sup> mice exhibit PTA with abnormal valve leaflets. Such increasing OFT abnormalities, from isolated bicuspid valve to PTA, are a consequence of a decreasing dosage of major and minor *Pbx* genes. Also, mutations in the gene encoding a *Pbx* DNA-binding partner, *Meis1*, result in VSD and overriding aorta, defects that fall within the spectrum of OFT abnormalities caused by *Pbx* mutations. The genetic influence of a major gene (*Pbx1*), minor genes (*Pbx2* and *Pbx3*) and an interacting gene (*Meis1*) demonstrates a multi-genetic origin of congenital heart disease.

**Table 1. Signaling molecules involved in cardiac septation and valve development**

| Gene                       | Target tissue                                                                           | Phenotype                                                                                                                                                            | Comment                                                                                                                                    | Reference                                                                                                    |
|----------------------------|-----------------------------------------------------------------------------------------|----------------------------------------------------------------------------------------------------------------------------------------------------------------------|--------------------------------------------------------------------------------------------------------------------------------------------|--------------------------------------------------------------------------------------------------------------|
| <b>TGF/BMP/SMAD</b>        |                                                                                         |                                                                                                                                                                      |                                                                                                                                            |                                                                                                              |
| <i>Acvr1 (Alk2)</i>        | Neural crest<br>Endothelium                                                             | PTA, VSD, PAA anomaly<br>ASD, VSD                                                                                                                                    | Defective NCC migration<br>↓EMT; ↓Msx1, Snail, pSmad1/2/5/8                                                                                | (Kaartinen et al., 2004; Wang et al., 2005)                                                                  |
| <i>Bmpr1a (Alk3)</i>       | SHF<br>Endothelium                                                                      | PTA, ASD, VSD<br>↓AV cushion EMT                                                                                                                                     | ↓Tbx20, ↑Isl1 at OFT; ↓Tbx2, Tbx3 in AV cushion                                                                                            | (Ma et al., 2005; Yang et al., 2006)                                                                         |
| <i>Bmpr2*</i>              | Global<br>(hypomorph)<br>Epiblast<br>Endothelium<br>Neural crest                        | PTA, IAA, VSD, no OFT<br>valves<br>DORV, ASD, VSD<br>Thick valves, ASD, VSD<br>OA                                                                                    | ↓periostin in OFT cushions                                                                                                                 | (Délot et al., 2003; Beppu et al., 2009)                                                                     |
| <i>Bmp2</i>                | Myocardium/<br>mesoderm                                                                 | Hypoplastic AV/OFT<br>cushions                                                                                                                                       | ↓Tbx2 and Has2 in cushion myocardium                                                                                                       | (Ma et al., 2005; Rivera-Feliciano and Tabin, 2006)                                                          |
| <i>Bmp4</i>                | SHF<br>Myocardium/<br>mesoderm<br>Myocardium                                            | PTA, VSD<br>PTA, VSD, PAA anomaly<br>DORV, ASD, AVSD                                                                                                                 | Semilunar valve hyperplasia<br>↓eHand, dHand, Sema3c, Pitx2; overlapping<br>functions of Bmp4/7 in OFT<br>Hypomorph, ↓proliferation in AVC | (Jiao et al., 2003; Abedin et al., 2004; McCulley et al., 2008)                                              |
| <i>Bmp6/7</i>              | Global                                                                                  | ASD, VSD                                                                                                                                                             | Bmp6/7 are functionally redundant                                                                                                          | (Kim et al., 2001)                                                                                           |
| <i>Chrd</i>                | Global                                                                                  | PTA, PAA anomaly                                                                                                                                                     | ↓Tbx1 and Fgf8 in mesoderm                                                                                                                 | (Bachiller et al., 2003)                                                                                     |
| <i>Ltbp1</i>               | Global                                                                                  | PTA, IAA, valve<br>hyperplasia                                                                                                                                       | ↓periostin                                                                                                                                 | (Todorovic et al., 2011)                                                                                     |
| <i>Smad4</i>               | Muscle<br>Neural crest<br><br>Endothelium                                               | DORV, VSD<br>PTA, hypoplastic OFT<br>cushion, PAA anomaly<br>↓AV cushion cellularity                                                                                 | ↑apoptosis; ↓Bmp4, Sema3c, Plxna2<br><br>↓proliferation, ↑apoptosis in AV cushions                                                         | (Jia et al., 2007; Azhar et al., 2010; Song et al., 2011)                                                    |
| <i>Smad6</i>               | Global                                                                                  | Hyperplastic valves                                                                                                                                                  |                                                                                                                                            | (Galvin et al., 2000)                                                                                        |
| <i>Smad7</i>               | Global                                                                                  | VSD, OFT misalignment                                                                                                                                                | ↑ pSmad2/3 and apoptosis in AVC                                                                                                            | (Chen et al., 2009)                                                                                          |
| <i>Tgfb1 (Alk5)</i>        | Neural crest<br>Endothelium                                                             | PTA, PAA anomaly<br>Hypoplastic AV cushion,<br>VSD                                                                                                                   | ↑apoptosis in NCC<br>↓proliferation in myocardium                                                                                          | (Wang et al., 2006; Sridurongrit et al., 2008)                                                               |
| <i>Tgfb2</i>               | Global                                                                                  | DORV, PTA, VSD, PAA<br>anomaly, thick valves                                                                                                                         |                                                                                                                                            | (Sanford et al., 1997; Bartram et al., 2001)                                                                 |
| <i>Tgfb2/3</i>             | Global                                                                                  | VSD                                                                                                                                                                  |                                                                                                                                            | (Dünker and Kriegelstein, 2002)                                                                              |
| <i>Tgfb2</i>               | Neural crest<br>Muscle<br><br>AV myocardium<br>Ventricular<br>myocardium<br>Endothelium | PTA, VSD, PAA anomaly<br>ASD, VSD ( <i>Sm22Cre</i> )<br>DORV, VSD ( <i>cTntCre</i> )<br>Tricuspid valve defect<br>PTA, OA, VSD, OFT valve<br>defect<br>VSD, OA, DORV | Descending aorta defects                                                                                                                   | (Wurdak et al., 2005; Choudhary et al., 2006; Jiao et al., 2006; Langlois et al., 2010; Robson et al., 2010) |
| <b>NOTCH</b>               |                                                                                         |                                                                                                                                                                      |                                                                                                                                            |                                                                                                              |
| <i>Hes1</i>                | Global                                                                                  | VSD, OA                                                                                                                                                              |                                                                                                                                            | (Rochais et al., 2009)                                                                                       |
| <i>Hey1</i><br><i>HeyL</i> | Global                                                                                  | VSD, AV, OFT valve<br>defects                                                                                                                                        | Impaired EMT in AV cushion                                                                                                                 | (Zhang and Fisher, 2007)                                                                                     |
| <i>Hey2<sup>±</sup></i>    | Global                                                                                  | ASD, VSD, OA, TOF, TA                                                                                                                                                |                                                                                                                                            | (Donovan et al., 2002; Fischer et al., 2004)                                                                 |
| <i>Jag1<sup>5</sup></i>    | SHF                                                                                     | PTA, DORV, PS, VSD, ASD,<br>IAA                                                                                                                                      | ↓Plxna2/Sema3c; ↓Fgf8 and Bmp signaling                                                                                                    | (Krantz et al., 1999; Eldadah et al., 2001; Warthen et al., 2006)                                            |
| <i>Notch<sup>11</sup></i>  | Neural crest<br><br>SHF                                                                 | VSD, PTA, DORV, PAA<br>anomaly, PS, valve<br>defect<br>PTA, DORV, IAA, VSD,<br>ASD, PS, TA, OFT valve<br>defects                                                     | NCC differentiation defects<br><br>↓Fgf8 in SHF                                                                                            | (High and Epstein, 2007; High et al., 2009; Jain et al., 2011)                                               |
| <i>Notch1*</i>             | Global                                                                                  | Absent EMT                                                                                                                                                           | ↓Tgfb2, Tgfb1/2/3                                                                                                                          | (Timmerman et al., 2004; Garg et al., 2005; McKellar et al., 2007)                                           |

Table 1. Continued on next page

Table 1. Continued

| Gene                                         | Target tissue                                        | Phenotype                                                                             | Comment                                                                                                                                                     | Reference                                                                                             |
|----------------------------------------------|------------------------------------------------------|---------------------------------------------------------------------------------------|-------------------------------------------------------------------------------------------------------------------------------------------------------------|-------------------------------------------------------------------------------------------------------|
| <i>Notch2</i> **                             | Global                                               | ASD, VSD, PS                                                                          |                                                                                                                                                             | (McCright et al., 2002; McDaniel et al., 2006)                                                        |
| <i>Psen1</i>                                 | Global                                               | VSD, DORV, PS                                                                         |                                                                                                                                                             | (Nakajima et al., 2004)                                                                               |
| <i>Rbpj</i>                                  | Global<br>Twist2 <sup>(+)</sup> tissue               | Absent EMT<br>VSD                                                                     |                                                                                                                                                             | (Timmerman et al., 2004; Morimoto et al., 2010)                                                       |
| <b>WNT</b>                                   |                                                      |                                                                                       |                                                                                                                                                             |                                                                                                       |
| <i>Ctnnb1</i><br>( $\beta$ -catenin)         | SHF                                                  | PTA, ASD, VSD, PAA anomaly ( <i>Islet1Cre</i> )<br>PTA ( <i>Mef2cCre</i> )            | <i>Islet1</i> as a downstream target; $\uparrow$ apoptosis, $\downarrow$ proliferation<br>$\downarrow$ CyclinD2, Tgfb2, BMP4                                | (Kioussi et al., 2002; Liebner et al., 2004; Ai et al., 2007; Lin et al., 2007; Huh and Ornitz, 2010) |
|                                              | Neural crest<br>Endothelium<br>Pharyngeal mesenchyme | PTA, TGA, DORV<br>Hypoplastic AV cushions<br>OA, DORV, PTA, VSD, ASD                  | $\downarrow$ Pitx2 in NCC<br>$\downarrow$ EMT<br>$\uparrow$ Tbx1 and Fgf8; introduction of Fgf8 <sup>+/-</sup> into mutant mice rescued the phenotype       |                                                                                                       |
| <i>Daam1</i>                                 | Global                                               | DORV, VSD                                                                             | Affect cytoskeleton and sarcomeres                                                                                                                          | (Li et al., 2011)                                                                                     |
| <i>Dvl2</i>                                  | Global                                               | PTA, DORV, TGA                                                                        | $\downarrow$ Pitx2; <i>Dvl2</i> <sup>+/-</sup> ; <i>Pitx2</i> <sup>+/-</sup> : PTA                                                                          | (Kioussi et al., 2002)                                                                                |
| <i>Dvl3</i>                                  | Global                                               | PTA, DORV                                                                             | <i>Dvl2</i> <sup>+/-</sup> ; <i>Dvl3</i> <sup>+/-</sup> : DORV, PTA, TGA<br><i>Dvl2</i> <sup>+/-</sup> ; <i>Dvl3</i> <sup>-/-</sup> : more severe phenotype | (Etheridge et al., 2008)                                                                              |
| <i>Wnt2</i>                                  | Global                                               | AVSD                                                                                  | $\downarrow$ EMT; $\downarrow$ proliferation of DM/DMP                                                                                                      | (Tian et al., 2010)                                                                                   |
| <i>Wnt5a</i> **                              | Global                                               | PTA, DORV, TGA, VSD, IAA                                                              | $\downarrow$ Plxna2 in NCC                                                                                                                                  | (Schleiffarth et al., 2007; Person et al., 2010)                                                      |
| <i>Wnt11</i>                                 | Global                                               | TGA, DORV, PTA, VSD                                                                   | $\downarrow$ Tgfb2                                                                                                                                          | (Zhou et al., 2007; Nagy et al., 2010)                                                                |
| <b>SHH</b>                                   |                                                      |                                                                                       |                                                                                                                                                             |                                                                                                       |
| <i>Shh</i>                                   | Global                                               | PTA, PAA anomaly, ASD, VSD                                                            | $\downarrow$ NCC population; defective DMP                                                                                                                  | (Washington Smoak et al., 2005; Goddeeris et al., 2007; Goddeeris et al., 2008)                       |
|                                              | Pharyngeal endoderm                                  | PTA, AVSD, PAA anomaly                                                                | Shortening of OFT                                                                                                                                           |                                                                                                       |
| <i>Smo</i>                                   | SHF                                                  | ASD, VSD, PAA anomaly, PTA, TGA ( <i>Islet1Cre</i> )<br>PTA, AVSD ( <i>Mef2cCre</i> ) | $\downarrow$ Tbx1 in mesoderm; $\downarrow$ Neuropilin2 in OFT; $\uparrow$ apoptosis in OFT<br>Defective DMP differentiation/migration                      | (Lin et al., 2006; Goddeeris et al., 2007; Goddeeris et al., 2008)                                    |
|                                              | Neural crest                                         | PTA, PAA anomaly                                                                      | Gain-of-function mutants also have PTA                                                                                                                      |                                                                                                       |
| <b>NFAT</b>                                  |                                                      |                                                                                       |                                                                                                                                                             |                                                                                                       |
| <i>Nfatc1</i>                                | Global                                               | Blunting of AV/OFT valves, VSD                                                        | Rescued by endothelial <i>Nfatc1</i> expression                                                                                                             | (de la Pompa et al., 1998; Ranger et al., 1998; Chang, C. P. et al., 2004; Zhou et al., 2005)         |
| <i>Nfatc2/3/4</i>                            | Global                                               | $\downarrow$ cushion mesenchyme                                                       | <i>Nfatc2/c3/c4</i> are functionally redundant                                                                                                              | (Chang, C. P. et al., 2004)                                                                           |
| <i>Ppp3r2</i><br>(Calcineurin B1)            | Endothelium<br>SHF                                   | Blunted AV/OFT valves<br>Absent OFT valves                                            | Phenocopies <i>Nfatc1</i> <sup>-/-</sup> embryos<br>$\uparrow$ apoptosis in conal cushion                                                                   | (Chang, C. P. et al., 2004; Lin et al., 2012)                                                         |
| <i>Dyrk1a/</i><br><i>Dscr1</i> <sup>§§</sup> | Global<br>(overexpressed)                            | Blunted valves                                                                        | Phenocopies <i>Nfatc1</i> <sup>-/-</sup> embryos                                                                                                            | (Arron et al., 2006)                                                                                  |

For definitions, see Glossary, Box 1. PAA, pharyngeal arch artery.

\**BMPR2* mutations found in patients with ASD, VSD, AVSD, PDA, PAPVR.

†*HEY2* mutations in CHD or Alagille syndrome (ASD, VSD, TOF, PS).

‡*JAG1* mutations in TOF or Alagille syndrome.

§*NOTCH* mutations found in patients with BAV.

¶*NOTCH1* mutations found in patients with aortic valve anomaly.

\*\**NOTCH2* mutations in Alagille syndrome.

††*WNT5A* mutations in Robinow Syndrome (ASD, VSD, TOF, PS).

§§Duplication in Down Syndrome (ASD, VSD, AVSD, valve defects).

**Table 2. Receptor tyrosine kinases, G protein-coupled receptors and nuclear receptors involved in cardiac septation and valve development**

| Gene                              | Target tissue                                                  | Phenotype                                                                             | Comment                                                                                                                                                                                                                                              | Reference                                                                                                 |
|-----------------------------------|----------------------------------------------------------------|---------------------------------------------------------------------------------------|------------------------------------------------------------------------------------------------------------------------------------------------------------------------------------------------------------------------------------------------------|-----------------------------------------------------------------------------------------------------------|
| <b>VEGF</b>                       |                                                                |                                                                                       |                                                                                                                                                                                                                                                      |                                                                                                           |
| <i>Vegf</i>                       | Global<br>Global<br>Global<br>Global<br>Global<br>Myocardium   | Aborted EMT in OFT<br>Blunted AV valves<br>VSD<br>VSD, DORV, TOF<br>VSD<br>Absent EMT | sFlt to antagonize Vegf signaling<br>Dominant-negative VegfR-2<br>Gain of function by deleting 3' UTR<br>Mutant mice only express <i>Vegf</i> <sup>f120/120</sup><br>Mutant mice only express <i>Vegf</i> <sup>f188/188</sup><br>Vegf overexpression | (Dor et al., 2001;<br>Stalmans et al., 2003;<br>van den Akker et al.,<br>2007; Stankunas et<br>al., 2010) |
| <b>EGF</b>                        |                                                                |                                                                                       |                                                                                                                                                                                                                                                      |                                                                                                           |
| <i>Egfr</i>                       | Global                                                         | OFT valve hyperplasia                                                                 |                                                                                                                                                                                                                                                      | (Chen et al., 2000;<br>Sibilia et al., 2003)                                                              |
| <i>ErbB3</i><br><i>Hbegf</i>      | Global<br>Global                                               | Hypoplastic valves<br>Hyperplastic valves                                             | ↑proliferation and pSmad1/5/8                                                                                                                                                                                                                        | (Erickson et al., 1997)<br>(Iwamoto et al., 2003;<br>Jackson et al., 2003)                                |
| <i>Nrg1</i>                       | Global                                                         | Cushion hypoplasia                                                                    |                                                                                                                                                                                                                                                      | (Meyer and<br>Birchmeier, 1995)                                                                           |
| <i>Ptpn11</i><br>( <i>Sph2</i> )* | Neural crest<br>Global (various<br><i>Ptpn11</i><br>mutations) | PTA, VSD<br>ASD, VSD, AVSD, DORV,<br>valve hyperplasia                                | Defective NCC migration and<br>differentiation<br>↑proliferation; ↓apoptosis of OFT                                                                                                                                                                  | (Tartaglia et al., 2001;<br>Araki et al., 2004;<br>Araki et al., 2009;<br>Nakamura et al.,<br>2009)       |
| <i>Nf1</i> <sup>†</sup>           | Global<br>Endothelium                                          | PTA, DORV, VSD, AV cushion<br>hyperplasia<br>DORV, VSD, AV cushion<br>hyperplasia     | ↑proliferation; ↓apoptosis; ↑EMT; Ras<br>activation also ↑EMT<br>↑Ras activity; neural crest deletion of<br>Nf1 has no cardiac phenotype                                                                                                             | (Brannan et al., 1994;<br>Lakkis and Epstein,<br>1998; Friedman et<br>al., 2002; Gitler et<br>al., 2003)  |
| <b>FGF</b>                        |                                                                |                                                                                       |                                                                                                                                                                                                                                                      |                                                                                                           |
| <i>Fgf8</i>                       | Cardiac mesoderm<br>SHF                                        | BAV, bicuspid PV, TGA<br>DORV, TGA                                                    | ↓Erm, Isl1, Mef2c in mesoderm<br>Mesodermal Fgf8 for OFT alignment;<br>endodermal Fgf8 for OFT septation                                                                                                                                             | (Park et al., 2006)                                                                                       |
| <i>Fgf8/10</i>                    | SHF<br>Cardiac mesoderm                                        | PTA, VSD<br>VSD, DORV, TGA, PTA, PAA<br>anomaly                                       |                                                                                                                                                                                                                                                      | (Watanabe et al.,<br>2010)                                                                                |
| <i>Fgf15</i>                      | Global                                                         | PTA, DORV, OA, VSD,<br>alignment defect                                               |                                                                                                                                                                                                                                                      | (Vincentz et al., 2005)                                                                                   |
| <i>Frs2</i>                       | Cardiac mesoderm<br>SHF                                        | PTA, DORV, OA, VSD<br>DORV, OA, VSD                                                   |                                                                                                                                                                                                                                                      | (Zhang et al., 2008)                                                                                      |
| <i>Fgfr1/2</i>                    | Cardiac mesoderm                                               | PTA, DORV, OA, VSD                                                                    | Less severe phenotype in <i>Fgfr1</i> or <i>Fgfr2</i><br>mutants                                                                                                                                                                                     | (Zhang et al., 2008)                                                                                      |
| <b>PDGF</b>                       |                                                                |                                                                                       |                                                                                                                                                                                                                                                      |                                                                                                           |
| <i>Pgfra</i> <sup>§</sup>         | Global<br>Neural crest                                         | VSD, DORV, PTA, PAA<br>anomaly<br>VSD, PTA, PAA anomaly                               |                                                                                                                                                                                                                                                      | (Schattelman et al.,<br>1995; Tallquist and<br>Soriano, 2003; Bleyl<br>et al., 2010)                      |
| <i>Pdgfb</i>                      | Global                                                         | VSD, DORV, PAA anomaly                                                                | Hypoplastic AV valves                                                                                                                                                                                                                                | (Van den Akker et al.,<br>2008)                                                                           |
| <i>Pdgfrb</i>                     | Global                                                         | VSD                                                                                   |                                                                                                                                                                                                                                                      | (Van den Akker et al.,<br>2008)                                                                           |
| <b>Endothelin signaling</b>       |                                                                |                                                                                       |                                                                                                                                                                                                                                                      |                                                                                                           |
| <i>Ece1/Ece2</i> <sup>¶</sup>     | Global                                                         | VSD, AVSD, DORV, PTA<br>( <i>Ece1</i> <sup>-/-</sup> ; <i>Ece2</i> <sup>-/-</sup> )   | <i>Ece1</i> <sup>-/-</sup> : DORV, PTA, VSD, IAA, PAA                                                                                                                                                                                                | (Yanagisawa et al.,<br>1998b; Hofstra et al.,<br>1999; Yanagisawa et<br>al., 2000)                        |
| <i>Edn1</i>                       | Global                                                         | VSD, DORV, PTA, PAA<br>anomaly                                                        |                                                                                                                                                                                                                                                      | (Kurihara et al., 1995)                                                                                   |
| <i>Ednra</i>                      | Global                                                         | VSD, DORV, TGA, PTA, IAA,<br>PAA anomaly                                              |                                                                                                                                                                                                                                                      | (Clouthier et al., 1998)                                                                                  |
| <b>ROR</b>                        |                                                                |                                                                                       |                                                                                                                                                                                                                                                      |                                                                                                           |
| <i>Ror1/Ror2</i> <sup>¶</sup>     | Global                                                         | TGA, VSD ( <i>Ror1</i> <sup>-/-</sup> ; <i>Ror2</i> <sup>-/-</sup> )                  | <i>Ror2</i> <sup>-/-</sup> : VSD                                                                                                                                                                                                                     | (Nomi et al., 2001;<br>Schwabe et al., 2004)                                                              |

Table 2. Continued on next page



Table 2. Continued

| Gene                     | Target tissue    | Phenotype                                                                     | Comment                                                                                                                                               | Reference                                                          |
|--------------------------|------------------|-------------------------------------------------------------------------------|-------------------------------------------------------------------------------------------------------------------------------------------------------|--------------------------------------------------------------------|
| <b>Nuclear receptors</b> |                  |                                                                               |                                                                                                                                                       |                                                                    |
| <i>Aldh1a2</i> **        | Chimera          | PTA                                                                           |                                                                                                                                                       | (Vermot et al., 2006; Ryckebusch et al., 2008; Pavan et al., 2009) |
| <i>Rara/Rarb</i>         | Global           | PTA, PAA anomaly ( <i>RARA1</i> <sup>-/-</sup> ; <i>RARB</i> <sup>-/-</sup> ) | <i>Rara1</i> <sup>-/-</sup> or <i>Rarb</i> <sup>-/-</sup> : no phenotype; <i>Rara1</i> <sup>-/-</sup> ; <i>Rxra</i> <sup>-/-</sup> : PTA, PAA anomaly | (Lee et al., 1997; Jiang et al., 2002; Li et al., 2010)            |
|                          | Cardiac mesoderm | PTA, DORV, OA                                                                 |                                                                                                                                                       |                                                                    |
| <i>Rxra</i>              | Global           | PTA, DORV, VSD, AVSD                                                          | Variable AV cushion defects                                                                                                                           | (Gruber et al., 1996)                                              |

For definitions, see Glossary, Box 1. PAA, pharyngeal arch artery.

\**PTPN11* mutation in Noonan syndrome (ASD, AVSD, TOF, OFT valve defects).

†*NF1* mutation in neurofibromatosis type I (PS, aortic coarctation).

‡*PDGFRA* mutation in TAPVR patients.

§ECE1/ECE2 mutation found in a patient with Hirschsprung disease and CHD.

¶*ROR2* mutation found in Robinow syndrome.

\*\**ALDH1A2* mutation found in TOF patients.

### GATA factors

The zinc finger GATA transcription factors are essential for cardiac septation and valve formation. For example, mice with *Gata4* hypomorphic alleles exhibit myocardial hypoplasia, DORV and AVSD (Crispino et al., 2001; Pu et al., 2004), and mice lacking endocardial *Gata4* have EMT failure in AV cushions (Rivera-Feliciano et al., 2006). *Gata4* cooperates with *Smad4* to control AV septation and EMT (Moskowitz et al., 2011). Disruption of endocardial *Smad4*, like *Gata4* mutations, results in EMT failure in AV cushions. *Gata4* and *Smad4* synergistically activate the expression of *Id2*, a helix-loop-helix transcriptional repressor, to regulate AV septation (Moskowitz et al., 2011). *Gata4* also interacts with *Tbx5* to control AV cushion development. *Gata4* and *Tbx5* double heterozygotes display thin myocardium as well as AVSD with a single atrioventricular valve (Maitra et al., 2009). *GATA4* mutations are found in patients with septal defects (ASD or AVSD) or valve abnormalities (aortic regurgitation, mitral regurgitation and/or pulmonary stenosis) (Garg et al., 2003; Okubo et al., 2004; Sarkozy et al., 2005; Moskowitz et al., 2011). Interestingly, certain *GATA4* missense mutations (G303E and G296S) in humans are known to disrupt the binding of GATA4 to SMAD4 (Moskowitz et al., 2011) or to TBX5 (Maitra et al., 2009), suggesting a conserved function of the human GATA4-SMAD4 and GATA4-TBX5 complex for AV septation and valve development.

*Gata5* is involved in aortic valve development. *Gata5*-null mice have reduced ventricular trabeculation and partially penetrant BAV (Laforest et al., 2011). Endocardial *Gata5* regulates aortic valve formation possibly through Notch signaling and endothelial nitric oxide synthase *Nos3* (Lee, T. C. et al., 2000; Laforest et al., 2011).

*Gata6* is essential for both AV and OFT development. *Gata6* synergizes with its transcription target *Wnt2* to regulate AV septation, and deletion of *Gata6* in cardiac progenitor cells causes AV septation defects (Tian et al., 2010). By contrast, *Gata6* regulates OFT septation through its activation of *Sema3c* and *Plxna2* (Lepore et al., 2006; Kodo et al., 2009). *Gata6* transcriptionally activates *Sema3c* in the OFT myocardium and *Plxna2* in NCCs to orchestrate the migration of NCCs into the OFT. Deletion of *Gata6* in the myocardium or NCCs causes *Sema3c* or *Plxna2* downregulation, leading to pharyngeal arch artery defects and OFT abnormalities (PTA or DORV) (Lepore et al., 2006). *GATA6* mutations that disrupt GATA6 nuclear localization (E486del) or abolish GATA6's transcriptional activity on *SEMA3C* and *PLXNA2* promoters (E486del and N466H) have been identified in patients with PTA (Kodo et al., 2009).

### T-box genes

*Tbx* genes encode T-box transcription factors that regulate multiple developmental processes (Greulich et al., 2011). The absence of *TBX1* is thought to be a major cause of 22q11 deletion syndrome (DiGeorge, velocardiofacial, and conotruncal face anomaly syndromes), which includes craniofacial abnormalities, pharyngeal arch artery defects and cardiac malformations (TOF, DORV and PTA). In mice, *Tbx1* germline mutations or tissue-specific mutations in the pharyngeal endoderm or mesoderm result in pharyngeal arch artery defects and cardiac abnormalities (PTA and VSD) (Jerome and Papaioannou, 2001; Merscher et al., 2001; Vitelli et al., 2002; Arnold et al., 2006; Zhang et al., 2006).

*Tbx2* is essential for the developmental identity of myocardium at the AV and OFT cushions. *Tbx2* is expressed in the cushion myocardium to repress the expression of chamber myocardium-specific genes (Habets et al., 2002; Christoffels et al., 2004; Harrelson et al., 2004). In *Tbx2*-null embryos, the cushion myocardium is partially turned into ventricular myocardium, resulting in hypoplastic endocardial cushions (Harrelson et al., 2004). Conversely, overexpression of *Tbx2* in the myocardium of the heart tube inhibits cardiac chamber formation and chamber-specific gene expression (Christoffels et al., 2004). Such ectopic *Tbx2* expression triggers excessive deposition of extracellular matrix in the ventricles and activates chamber myocardium to stimulate EMT (Shirai et al., 2009), rendering the chamber myocardium 'cushion-like'. These changes are at least partly caused by ectopic activation by *Tbx2* of the matrix-producing *Has2* and the EMT-promoting *Tgfb2* (Shirai et al., 2009).

*Tbx5* is essential for determining the left ventricle identity and interventricular boundary: the boundary between *Tbx5*-expressing left ventricle and non-*Tbx5*-expressing right ventricle determines the site of interventricular septation (Bruneau et al., 1999; Takeuchi et al., 2003). In mice, *Tbx5* overexpression causes expansion of the left ventricle and a loss of interventricular septum, whereas in chick an extra interventricular septum forms at an ectopically induced boundary between *Tbx5*-positive and *Tbx5*-negative ventricles (Takeuchi et al., 2003). *TBX5* mutations are associated with Holt-Oram syndrome, which is characterized by upper limb and cardiac malformations (ASD, VSD) (Basson et al., 1997; Li et al., 1997). These limb and cardiac defects are seen in mice with a heterozygous *Tbx5* mutation (Bruneau et al., 2001), and loss of endocardial *Tbx5* causes excessive apoptosis in primary atrial septum, possibly through disruption of the *Tbx5/Gata4-Nos3* pathway (Nadeau et al., 2010).

**Table 3. Transcription factors involved in cardiac septation and valve formation**

| Gene                                  | Target tissue                           | Phenotype                                                                             | Comment                                                                                                                                                                                                                                                                                 | Reference                                    |
|---------------------------------------|-----------------------------------------|---------------------------------------------------------------------------------------|-----------------------------------------------------------------------------------------------------------------------------------------------------------------------------------------------------------------------------------------------------------------------------------------|----------------------------------------------|
| <b>PAX/PBX/MEIS</b>                   |                                         |                                                                                       |                                                                                                                                                                                                                                                                                         |                                              |
| <i>Pax3</i>                           | Global                                  | PTA ( <i>Splotch</i> mice)                                                            | Deletion of <i>Msx2</i> rescues the phenotype                                                                                                                                                                                                                                           | (Conway et al., 1997;                        |
|                                       | Global                                  | OFT valve hyperplasia                                                                 | ↓ <i>Sema3c</i> ; ↑ECM, ↓apoptosis in OFT cushion                                                                                                                                                                                                                                       | Kwang et al., 2002;                          |
|                                       | Global                                  | PS, VSD                                                                               | ↓NCC migration                                                                                                                                                                                                                                                                          | Jain et al., 2011;                           |
|                                       | Neural crest                            | DORV, VSD ( <i>AP2αCre</i> )                                                          | <i>WntCre</i> -mediated deletion: no heart defects                                                                                                                                                                                                                                      | Olaopa et al., 2011)                         |
| <i>Pbx1/2/3</i>                       | Global                                  | PTA, VSD, PAA anomaly ( <i>Pbx1<sup>-/-</sup></i> )                                   | <i>Pbx1/2/3</i> cooperates to pattern pharyngeal arch artery and OFT; <i>Pbx1</i> mutations abolish <i>Pax3</i> in premigratory NCC; ↑ <i>Msx2</i> in NCC; <i>Msx2<sup>+/-</sup></i> or <i>Msx2<sup>-/-</sup></i> partially rescue truncal defects of <i>Pbx1<sup>-/-</sup></i> embryos | (Chang et al., 2008; Stankunas et al., 2008) |
| <i>Meis1</i>                          | Global                                  | OA, VSD, BAV ( <i>Pbx1<sup>+/-</sup>;2<sup>-/-</sup>;3<sup>+/-</sup></i> )            |                                                                                                                                                                                                                                                                                         | (Stankunas et al., 2008)                     |
| <i>Msx1/2</i>                         | Global                                  | OA, VSD ( <i>Pbx1<sup>+/-</sup>;2<sup>-/-</sup>;3<sup>+/-</sup></i> )                 |                                                                                                                                                                                                                                                                                         | (Chen et al., 2007)                          |
| <b>TBX</b>                            |                                         |                                                                                       |                                                                                                                                                                                                                                                                                         |                                              |
| <i>Tbx1*</i>                          | Global                                  | PTA, VSD, PAA anomaly ( <i>Tbx1<sup>-/-</sup></i> )                                   |                                                                                                                                                                                                                                                                                         | (Jerome and Papaioannou, 2001;               |
|                                       | Global                                  | PAA anomaly, TOF ( <i>Tbx1<sup>+/-</sup></i> )                                        |                                                                                                                                                                                                                                                                                         | Lindsay et al., 2001;                        |
|                                       | Pharyngeal endoderm                     | PAA anomaly, PTA, VSD                                                                 |                                                                                                                                                                                                                                                                                         | Merscher et al., 2001;                       |
|                                       | Mesoderm                                | PTA, TGA, DORV, VSD, PAA anomaly                                                      | Re-expression of <i>Tbx1</i> rescues PTA and VSD                                                                                                                                                                                                                                        | Xu et al., 2004;                             |
|                                       | Tbx1 territory                          | PTA, VSD                                                                              |                                                                                                                                                                                                                                                                                         | Arnold et al., 2006;                         |
|                                       | Cardiac mesoderm                        | PTA, PAA anomaly                                                                      |                                                                                                                                                                                                                                                                                         | Zhang et al., 2006;                          |
| <i>Tbx2</i>                           | Global                                  | DORV, PAA anomaly                                                                     | AV and OFT cushions are hypoplastic                                                                                                                                                                                                                                                     | (Harrelson et al., 2004;                     |
|                                       | Myocardium                              | Hyperplastic cushions                                                                 | AV and OFT cushions are hyperplastic                                                                                                                                                                                                                                                    | Shirai et al., 2009)                         |
| <i>Tbx3</i>                           | Global                                  | TGA, DORV, VSD, PAA anomaly                                                           |                                                                                                                                                                                                                                                                                         | (Meneghini et al., 2006;                     |
|                                       |                                         |                                                                                       |                                                                                                                                                                                                                                                                                         | Bakker et al., 2008;                         |
|                                       |                                         |                                                                                       |                                                                                                                                                                                                                                                                                         | Mesbah et al., 2008)                         |
| <i>Tbx5<sup>†</sup></i>               | Global                                  | ASD, VSD                                                                              | Activates <i>Cx40</i> and ANF                                                                                                                                                                                                                                                           | (Basson et al., 1997; Li                     |
|                                       | Endothelium                             | ASD                                                                                   | ↑apoptosis in primary atrial septum                                                                                                                                                                                                                                                     | et al., 1997; Bruneau                        |
|                                       |                                         |                                                                                       |                                                                                                                                                                                                                                                                                         | et al., 2001; Nadeau                         |
|                                       |                                         |                                                                                       |                                                                                                                                                                                                                                                                                         | et al., 2010)                                |
| <i>Tbx20<sup>§</sup></i>              | Global                                  | OFT malformation                                                                      | OFT balloons out like a cardiac chamber                                                                                                                                                                                                                                                 | (Stennard et al., 2005;                      |
|                                       | Global (siRNA)                          | PTA, DORV, variable OFT valve defects                                                 |                                                                                                                                                                                                                                                                                         | Takeuchi et al., 2005;                       |
|                                       |                                         |                                                                                       |                                                                                                                                                                                                                                                                                         | Kirk et al., 2007; Liu,                      |
|                                       |                                         |                                                                                       |                                                                                                                                                                                                                                                                                         | C. et al., 2008)                             |
| <b>GATA</b>                           |                                         |                                                                                       |                                                                                                                                                                                                                                                                                         |                                              |
| <i>Gata3</i>                          | Global                                  | PTA, DORV, VSD, ASD, PAA anomaly                                                      |                                                                                                                                                                                                                                                                                         | (Raid et al., 2009)                          |
| <i>Gata4<sup>¶</sup></i>              | Global ( <i>Gata4<sup>ki/ki</sup></i> ) | VSD, AVSD, DORV                                                                       | <i>Gata4<sup>ki</sup></i> disrupts its binding with <i>Fog2</i>                                                                                                                                                                                                                         | (Crispino et al., 2001;                      |
|                                       | Global                                  | AVSD, DORV                                                                            | Hypomorphic alleles                                                                                                                                                                                                                                                                     | Garg et al., 2003;                           |
|                                       | Endothelium                             | ↓EMT in AV cushion                                                                    | Interacts with <i>Smad4</i> and <i>Tbx5</i>                                                                                                                                                                                                                                             | Okubo et al., 2004;                          |
|                                       | SHF                                     | PTA                                                                                   |                                                                                                                                                                                                                                                                                         | Pu et al., 2004;                             |
|                                       |                                         |                                                                                       |                                                                                                                                                                                                                                                                                         | Rivera-Feliciano et                          |
|                                       |                                         |                                                                                       |                                                                                                                                                                                                                                                                                         | al., 2006; Maitra et                         |
|                                       |                                         |                                                                                       |                                                                                                                                                                                                                                                                                         | al., 2009; Moskowitz                         |
|                                       |                                         |                                                                                       |                                                                                                                                                                                                                                                                                         | et al., 2011)                                |
| <i>Gata5</i>                          | Global                                  | BAV                                                                                   | ↓Notch and <i>Nos3</i> ; phenocopied <i>Nos3<sup>-/-</sup></i>                                                                                                                                                                                                                          | (Lee, T. C. et al., 2000;                    |
|                                       |                                         |                                                                                       |                                                                                                                                                                                                                                                                                         | Lafrest et al., 2011)                        |
| <i>Gata6<sup>#</sup></i>              | Neural crest                            | PTA, DORV, VSD, IAA, PAA anomaly                                                      | ↓ <i>Plxn2</i> in NCC                                                                                                                                                                                                                                                                   | (Lepore et al., 2006;                        |
|                                       | Smooth muscle and myocardium            | PTA, DORV, VSD, IAA, PAA anomaly                                                      | ↓ <i>Sema3c</i> in OFT myocardium                                                                                                                                                                                                                                                       | Kodo et al., 2009;                           |
|                                       | Cardiac progenitor                      | AVSD                                                                                  |                                                                                                                                                                                                                                                                                         | Tian et al., 2010)                           |
| <i>Zfp2 (Fog2)</i>                    | Global                                  | ASD, VSD, OA, TA, pulmonary trunk stenosis                                            |                                                                                                                                                                                                                                                                                         | (Svensson et al., 2000;                      |
|                                       |                                         |                                                                                       |                                                                                                                                                                                                                                                                                         | Tevosian et al., 2000)                       |
| <b>Forkhead transcription factors</b> |                                         |                                                                                       |                                                                                                                                                                                                                                                                                         |                                              |
| <i>Foxc1**</i>                        | Global                                  | Hypoplastic OFT ( <i>Foxc1<sup>+/-</sup></i> ;                                        | ↓ <i>Fgf8/Fgf10</i> , <i>Tbx1</i> in mesoderm; ↓proliferation                                                                                                                                                                                                                           | (Lines et al., 2002; Seo                     |
| <i>Foxc2**</i>                        |                                         | <i>Foxc2<sup>-/-</sup></i> )                                                          | in OFT and AV cushion                                                                                                                                                                                                                                                                   | and Kume, 2006)                              |
|                                       |                                         | VSD, IAA, hypoplastic OFT ( <i>Foxc1<sup>-/-</sup></i> ; <i>Foxc2<sup>-/-</sup></i> ) |                                                                                                                                                                                                                                                                                         |                                              |

Table 3. Continued on next page

Table 3. Continued

| Gene                               | Target tissue    | Phenotype                             | Comment                                                                               | Reference                                                           |
|------------------------------------|------------------|---------------------------------------|---------------------------------------------------------------------------------------|---------------------------------------------------------------------|
| <i>Foxc2</i>                       | Global           | PTA, VSD                              | Only <i>Foxc2</i> <sup>-/-</sup> ; <i>Ednra</i> <sup>-/-</sup> has cardiac phenotypes | (Kanzaki-Kato et al., 2005)                                         |
| <i>Foxd3</i>                       | Neural crest     | PTA, PAA anomaly                      |                                                                                       | (Teng et al., 2008; Nelms et al., 2011)                             |
| <i>Foxh1</i> <sup>††</sup>         | Global           | Severe OFT hypoplasia                 | Cooperates with Nkx2.5 to regulate Mef2c                                              | (von Both et al., 2004; Roessler et al., 2008)                      |
| <b>Other transcription factors</b> |                  |                                       |                                                                                       |                                                                     |
| <i>Cited2</i> <sup>§§</sup>        | Global           | ASD, VSD, OA, DORV, PTA, PAA anomaly  | Interact with TFAP2                                                                   | (Bamforth et al., 2001; Sperling et al., 2005)                      |
| <i>Ets1</i> <sup>¶¶</sup>          | Global           | VSD, ASD                              |                                                                                       | (Gao et al., 2010; Ye et al., 2010)                                 |
| <i>Hand2</i>                       | Neural crest     | PS, VSD, PAA anomaly                  |                                                                                       | (Morikawa and Cserjesi, 2008)                                       |
| <i>Id2</i>                         | Global           | AVSD, VSD                             |                                                                                       | (Moskowitz et al., 2011)                                            |
| <i>Pitx2</i> <sup>***</sup>        | Global<br>Muscle | ASD, DORV, TGA, PTA<br>ASD, VSD, DORV |                                                                                       | (Kitamura et al., 1999; Kioussi et al., 2002; Tessari et al., 2008) |
| <i>Sox4</i>                        | Global           | PTA, DORV, VSD                        | Variable truncal valve defects                                                        | (Schilham et al., 1996; Ya et al., 1998)                            |
| <i>Tcfap2a</i><br>( <i>AP-2a</i> ) | Global           | PTA, DORV, TOF, IAA, PAA anomaly, PS  |                                                                                       | (Brewer et al., 2002)                                               |

For definitions, see Glossary, Box 1. PAA, pharyngeal arch artery.

\**TBX1* is deleted in 22q11 deletion syndrome (DORV, TOF, PTA).

†*TBX5* mutation in Holt–Oram Syndrome (ASD, VSD).

‡*TBX20* mutation found in patients with ASD, VSD or TOF.

¶*GATA4* mutation found in patients with ASD, AVSD or OFT valve defects.

§*GATA6* mutations found in patients with PTA.

\*\**FOXC1* mutations in Axenfeld-Rieger malformations (ASD, mitral valve dysplasia).

††*FOXH1* mutations found in patients with ASD, AVSD, DORV, TOF, TGA, PAA anomaly.

§§*CITED2* mutations in ASD, VSD or TOF patients.

¶¶*ETS1* mutations in Jacobsen syndrome (ASD, VSD, DORV, aortic stenosis, BAV, PS, mitral stenosis, PAA anomaly).

\*\*\**PITX2* mutations in Axenfeld-Rieger Syndrome (ASD, mitral valve dysplasia).

*TBX20* mutations occur in patients with various valve or septal malformations, including ASD, VSD and TOF (Kirk et al., 2007; Liu, C. et al., 2008). In line with this, *Tbx20* knockdown in mice causes valve malformations (absent pulmonic valve with rudimentary aortic and tricuspid valves) and OFT defects (PTA or DORV) (Takeuchi et al., 2005).

### MicroRNAs

MicroRNAs (miRNAs), which are short noncoding RNA species that post-transcriptionally silence target gene expression, have been implicated in multiple aspects of embryogenesis (Pauli et al., 2011). The biogenesis of functional miRNAs requires an RNase Dicer, the mutation of which abrogates the production of most mature miRNA species. Ablation of *Dicer* in the myocardium using *Nkx2.5Cre* (Stanley et al., 2002) causes DORV with VSD, accompanied by upregulation of *Pitx2* and *Sema3c* in the myocardium (Saxena and Tabin, 2010). Deletion of *Dicer* in NCCs leads to abnormal pharyngeal arch arteries, VSD, DORV or PTA (Huang et al., 2010; Sheehy et al., 2010). Several miRNAs are known to regulate cardiac septation and valve development. Inactivation of *Mir1a-2* or miRNA-17~92 (*MirC1*), or compound deletion of *Mir133a-1* and *Mir133a-2* gives rise to VSD (Zhao et al., 2007; Liu, N. et al., 2008; Ventura et al., 2008), whereas ablation of miRNA-126 (*Mir126* – Mouse Genome Informatics) results in AV valve defects (Stankunas et al., 2010). Because miRNA-126 is a modifier of VEGF signaling (Fish et al., 2008; Wang et al., 2008), it is possible that miRNA-126 interacts with calcineurin/NFAT signaling (Chang, C. P. et al., 2004) to modulate VEGF activities during AV valve development.

### Chromatin regulators

Gene regulation at the chromatin level is achieved by three processes: DNA methylation, ATP-dependent chromatin remodeling, and covalent histone modifications. Factors that regulate these processes to alter chromatin structure play crucial roles in heart development and disease, and the details of these are described in recent reviews (Chang and Bruneau, 2011; Han et al., 2011). Table 4 summarizes the roles of chromatin-regulating factors known to regulate cardiac septation or valve development. These factors include chromatin remodelers (BAF complex, *Chd7*), polycomb repressive complex 1 (*Phc1*, also known as *Rae28*), histone methyltransferases (*Whsc1*, *Mll2*), histone demethylases (*Jarid2*, also known as *Jumonji*; *Jmjd6*, also known as *Ptdsr*), histone acetyltransferase (*p300*; *Ep300* – Mouse Genome Informatics), sirtuins (*Sirt1*) and histone deacetylases (*Hdac3*, *Hdac5*, *Hdac9*).

### New areas of research

Although murine genetic models have provided insights into the pathogenesis of human congenital heart disease (CHD), these models have not been able to fully recapitulate the spectrum of human pathobiology. One likely explanation is that the majority of mutations identified in patients with CHD are point mutations or insertions/deletions in the coding region (Wessels and Willems, 2010), which may generate amorphic, hypomorphic or hypermorphic alleles. However, murine studies largely use amorphic alleles and do not tackle modifier genes or variants in the noncoding region of the genome that can alter disease risk (Musunuru et al., 2010; Winston et al., 2010).

One way to overcome these limitations is to randomly mutagenize mice and screen for different susceptibility alleles or noncoding variants associated with CHD. The offspring of mice randomly mutagenized by N-ethyl-N-nitrosourea exhibit several

types of cardiac septation defects, including VSD, DORV, PTA and TGA (Yu et al., 2004). Some of the genomic lesions have been identified as point mutations in genes essential for heart development, such as *Sema3C* (L605P) and *connexin 43* (W45X),

**Table 4. MicroRNAs, chromatin regulators and other factors involved in cardiac septation and valve development**

| Gene                                 | Target tissue                       | Phenotype                                                         | Comment                                                                                                                                                              | Reference                                                                  |
|--------------------------------------|-------------------------------------|-------------------------------------------------------------------|----------------------------------------------------------------------------------------------------------------------------------------------------------------------|----------------------------------------------------------------------------|
| <b>MicroRNAs</b>                     |                                     |                                                                   |                                                                                                                                                                      |                                                                            |
| <i>Dicer1</i>                        | Myocardium<br>Neural crest          | DORV, VSD<br>VSD, DORV, IAA, PTA                                  | ↑ <i>Sema3c</i> , <i>Pitx2</i>                                                                                                                                       | (Huang et al., 2010;<br>Saxena and Tabin,<br>2010; Sheehy et al.,<br>2010) |
| <i>miR-17-92</i><br>( <i>Mirc1</i> ) | Global                              | VSD                                                               | <i>miR17-92<sup>-/-</sup>;miR106b-25<sup>-/-</sup></i> : AVSD<br><i>miR17-92<sup>-/-</sup>;miR106b-25<sup>-/-</sup>;miR106a-363<sup>-/-</sup></i> :<br>ASD, VSD      | (Ventura et al., 2008)                                                     |
| <i>Mir1a-2</i>                       | Global                              | VSD                                                               |                                                                                                                                                                      | (Zhao et al., 2007)                                                        |
| <i>Mir126</i>                        | Global                              | Blunted AV valves                                                 | miR-126 might modulate VEGF signaling                                                                                                                                | (Stankunas et al.,<br>2010)                                                |
| <i>Mir133a-1/2</i>                   | Global                              | VSD                                                               |                                                                                                                                                                      | (Liu, N. et al., 2008)                                                     |
| <b>Chromatin regulators</b>          |                                     |                                                                   |                                                                                                                                                                      |                                                                            |
| <i>Smarca4</i><br>( <i>Brg1</i> )    | Global (Het)<br>SHF                 | VSD<br>Shortening of OFT                                          | Interact with <i>Nkx2.5</i> , <i>Tbx5</i> and <i>Tbx20</i>                                                                                                           | (Hang et al., 2010;<br>Takeuchi et al.,<br>2011)                           |
| <i>Pbrm1</i><br>( <i>Baf180</i> )    | Global                              | VSD                                                               |                                                                                                                                                                      | (Wang et al., 2004)                                                        |
| <i>Hdac3</i>                         | Neural crest                        | IAA, DORV, VSD                                                    | Defective smooth muscle cell differentiation                                                                                                                         | (Singh et al., 2011)                                                       |
| <i>Hdac5/9</i>                       | Global                              | VSD                                                               |                                                                                                                                                                      | (Chang, S. et al., 2004)                                                   |
| <i>Sirt1</i>                         | Global                              | ASD, VSD                                                          |                                                                                                                                                                      | (Cheng et al., 2003)                                                       |
| <i>Jarid2</i>                        | Global                              | DORV, VSD                                                         | Also known as jumonji                                                                                                                                                | (Lee, Y. et al., 2000)                                                     |
| <i>Jmjd6</i>                         | Global                              | VSD, DORV                                                         | Pulmonary artery hypoplasia                                                                                                                                          | (Schneider et al.,<br>2004)                                                |
| <i>Ep300</i>                         | Global                              | ASD, VSD                                                          |                                                                                                                                                                      | (Shikama et al., 2003)                                                     |
| <i>Whsc1</i>                         | Global                              | ASD, VSD                                                          | Interact with <i>Nkx2.5</i>                                                                                                                                          | (Nimura et al., 2009)                                                      |
| <i>Phc1</i><br>( <i>Rae28</i> )      | Global                              | TOF, DORV, aortic stenosis                                        | ↓ <i>Nkx2.5</i> expression                                                                                                                                           | (Takahara et al., 1997)                                                    |
| <i>Chd7*</i>                         | Global (Het)<br>Global (ENU)        | IAA, PAA anomaly<br>VSD                                           | Interact with <i>Tbx1</i>                                                                                                                                            | (Bosman et al., 2005;<br>Randall et al., 2009)                             |
| <i>MLL2<sup>‡</sup></i>              |                                     |                                                                   |                                                                                                                                                                      | (Ng et al., 2010)                                                          |
| <b>ECM protein</b>                   |                                     |                                                                   |                                                                                                                                                                      |                                                                            |
| <i>Hspg2</i>                         | Global                              | TGA, OFT valve hyperplasia                                        | Excess conotruncal mesenchyme                                                                                                                                        | (Costell et al., 2002)                                                     |
| <i>Hapln1</i>                        | Global                              | ASD, VSD, AVSD, DORV                                              | ↓Versican expression                                                                                                                                                 | (Wirrig et al., 2007)                                                      |
| <i>Gpc3<sup>§</sup></i>              | Global                              | ASD, VSD, DORV                                                    | ↓ <i>Shh</i> expression                                                                                                                                              | (Ng et al., 2009)                                                          |
| <i>Postn</i>                         | Global                              | ASD                                                               | Suppress myocardial differentiation                                                                                                                                  | (Norris et al., 2008)                                                      |
| <i>Fbln1</i>                         | Global                              | ASD, VSD, OA, DORV, PAA<br>anomaly                                |                                                                                                                                                                      | (Cooley et al., 2008)                                                      |
| <b>Plexins/Semaphorins</b>           |                                     |                                                                   |                                                                                                                                                                      |                                                                            |
| <i>Plxna2</i>                        | Global                              | PTA, IAA                                                          | ↓HKN1-expressing cells in OFT                                                                                                                                        | (Toyofuku et al.,<br>2008)                                                 |
| <i>Plxnd1</i>                        | Global<br>Endothelium               | PTA, VSD<br>PTA, VSD                                              |                                                                                                                                                                      | (Gitler et al., 2004;<br>Zhang et al., 2009)                               |
| <i>Sema3c</i>                        | Global                              | IAA, VSD, PTA                                                     | ↓NCC migration                                                                                                                                                       | (Feiner et al., 2001)                                                      |
| <b>Adhesion/migration proteins</b>   |                                     |                                                                   |                                                                                                                                                                      |                                                                            |
| <i>Cdh2</i>                          | Neural crest                        | PTA                                                               |                                                                                                                                                                      | (Luo et al., 2006)                                                         |
| <i>Ptk2</i> (FAK)                    | Cardiac<br>mesoderm<br>Neural crest | VSD, OA, DORV, PTA, OFT<br>valve hyperplasia<br>IAA, VSD, OA, PTA | ↓MF20-positive cells in OFT<br>↓ <i>Sema3c</i> and <i>Perlecan</i> ; disorganized OFT<br>mesenchyme; mediate through <i>Erk1/2</i> , <i>Crk</i><br>↑apoptosis of NCC | (Hakim et al., 2007;<br>Vallejo-Illarramendi<br>et al., 2009)              |
| <i>Rac1</i>                          | Neural crest                        | PTA                                                               |                                                                                                                                                                      | (Thomas et al., 2010)                                                      |

For definitions, see Glossary, Box 1. PAA, pharyngeal arch artery.

\**CHD7* mutations in CHARGE syndrome (ASD, DORV, TOF, PTA).

†*MLL2* mutation found in ASD, VSD, aortic coarctation in Kabuki syndrome patients.

§*GPC3* mutations in Simpson-Golabi-Behmel syndrome (ASD, VSD, OFT valve defects).



whereas most lesions await further investigations. In another cohort of randomly mutagenized mice, cardiac septal defects are the predominant lesion causing perinatal lethality (Kamp et al., 2010). Genomic lesions associated with AVSD in these mice have been mapped to a region spanning several megabases. Further elucidation of the genomic regions responsible for AVSD or other septation defects will provide additional insights into the genetic basis of human CHD.

Genome-wide surveys have also been applied to the genetic studies of human CHD. In sporadic, nonsyndromic TOF, copy number variants have been identified in several genomic loci, including those that encode known disease-associated genes (*NOTCH1*, *JAG1*) (Greenway et al., 2009). In patients with BAV, two haplotypes of a single nucleotide polymorphism (SNP) are strongly associated with the disease (Wooten et al., 2010). Also, next-generation sequencing of exome and whole genomes have facilitated studies of the genetic base of human diseases (Bamshad et al., 2011). Exome/genome analysis of disease-afflicted families or of large population-based studies provides a new, powerful tool for dissecting complex genetic traits and identifying disease-associated genomic lesions, intractable to conventional methods. Genome-wide association studies thus prompt further mechanistic investigations to define the causal roles of newly identified genomic lesions in CHD patients. It will be necessary to create new animal models carrying specific mutations to elucidate the mechanisms of how such genomic lesions cause human CHD.

## Conclusions

The variety and large number of cells, genes and molecular pathways involved in cardiac septation and valve development highlights the complexity of the underlying developmental process. The spatiotemporal development of cardiac progenitor cells and endocardial cushions is regulated by genes that control diverse molecular and cellular processes, including those that control ligand-receptor signaling, signal transduction, transcription, chromatin or epigenetic regulation, extracellular matrix production, cell adhesion, and cellular motility (Tables 1-4). Interactions between these genes in specific tissues and during distinct time windows of embryonic development are crucial for cushion development, septation and valve formation. Future research using multidisciplinary approaches from developmental biology, genetics, molecular biology and systems biology will be essential to resolve the mechanisms that underlie partitioning of the heart and to provide information for better treatment of CHDs.

## Funding

C.-P.C. is supported by funds from the Oak Foundation, March of Dimes Foundation, Lucile Packard Foundation, National Institutes of Health (NIH), Children's Heart Foundation, Office of the University of California (TRDRP), California Institute of Regenerative Medicine, and the American Heart Association (AHA) (National Scientist Development Award and Established Investigator Award). C.-J.L. is supported by a Lucille P. Markey Stanford Graduate Fellowship; C.-Y.L. and C.-H.C. by Stanford Institutional Fund. B.Z. is supported by NIH and AHA. Deposited in PMC for release after 12 months.

## Competing interests statement

The authors declare no competing financial interests.

## References

- Abedin, M., Tintut, Y. and Demer, L. L.** (2004). Mesenchymal stem cells and the artery wall. *Circ. Res.* **95**, 671-676.
- Abu-Issa, R. and Kirby, M. L.** (2007). Heart field: from mesoderm to heart tube. *Annu. Rev. Cell Dev. Biol.* **23**, 45-68.
- Ai, D., Fu, X., Wang, J., Lu, M. F., Chen, L., Baldini, A., Klein, W. H. and Martin, J. F.** (2007). Canonical Wnt signaling functions in second heart field to promote right ventricular growth. *Proc. Natl. Acad. Sci. USA* **104**, 9319-9324.
- Akhurst, R. J., Lehnert, S. A., Faissner, A. and Duffie, E.** (1990). TGF beta in murine morphogenetic processes: the early embryo and cardiogenesis. *Development* **108**, 645-656.
- Anderson, R. H., Webb, S., Brown, N. A., Lamers, W. and Moorman, A.** (2003a). Development of the heart: (2) Septation of the atriums and ventricles. *Heart* **89**, 949-958.
- Anderson, R. H., Webb, S., Brown, N. A., Lamers, W. and Moorman, A.** (2003b). Development of the heart: (3) formation of the ventricular outflow tracts, arterial valves, and intrapericardial arterial trunks. *Heart* **89**, 1110-1118.
- Araki, T., Mohi, M. G., Ismat, F. A., Bronson, R. T., Williams, I. R., Kutok, J. L., Yang, W., Pao, L. I., Gilliland, D. G., Epstein, J. A. et al.** (2004). Mouse model of Noonan syndrome reveals cell type- and gene dosage-dependent effects of Ptpn11 mutation. *Nat. Med.* **10**, 849-857.
- Araki, T., Chan, G., Newbigging, S., Morikawa, L., Bronson, R. T. and Neel, B. G.** (2009). Noonan syndrome cardiac defects are caused by PTPN11 acting in endocardium to enhance endocardial-mesenchymal transformation. *Proc. Natl. Acad. Sci. USA* **106**, 4736-4741.
- Arnold, J. S., Werling, U., Braunstein, E. M., Liao, J., Nowotschin, S., Edelmann, W., Hebert, J. M. and Morrow, B. E.** (2006). Inactivation of Tbx1 in the pharyngeal endoderm results in 22q11DS malformations. *Development* **133**, 977-987.
- Arron, J. R., Winslow, M. M., Polleri, A., Chang, C. P., Wu, H., Gao, X., Neilson, J. R., Chen, L., Heit, J. J., Kim, S. K. et al.** (2006). NFAT dysregulation by increased dosage of DSCR1 and DYRK1A on chromosome 21. *Nature* **441**, 595-600.
- Azhar, M., Wang, P. Y., Frugier, T., Koishi, K., Deng, C., Noakes, P. G. and McLennan, I. S.** (2010). Myocardial deletion of Smad4 using a novel  $\alpha$  skeletal muscle actin Cre recombinase transgenic mouse causes misalignment of the cardiac outflow tract. *Int. J. Biol. Sci.* **6**, 546-555.
- Bachiller, D., Klingensmith, J., Shneyder, N., Tran, U., Anderson, R., Rossant, J. and De Robertis, E. M.** (2003). The role of chordin/Bmp signals in mammalian pharyngeal development and DiGeorge syndrome. *Development* **130**, 3567-3578.
- Bakker, M. L., Boukens, B. J., Mommersteeg, M. T., Brons, J. F., Wakker, V., Moorman, A. F. and Christoffels, V. M.** (2008). Transcription factor Tbx3 is required for the specification of the atrioventricular conduction system. *Circ. Res.* **102**, 1340-1349.
- Bamforth, S. D., Bragança, J., Eloranta, J. J., Murdoch, J. N., Marques, F. I., Kranc, K. R., Farza, H., Henderson, D. J., Hurst, H. C. and Bhattacharya, S.** (2001). Cardiac malformations, adrenal agenesis, neural crest defects and exencephaly in mice lacking Cited2, a new Tfp2 co-activator. *Nat. Genet.* **29**, 469-474.
- Bamshad, M. J., Ng, S. B., Bigham, A. W., Tabor, H. K., Emond, M. J., Nickerson, D. A. and Shendure, J.** (2011). Exome sequencing as a tool for Mendelian disease gene discovery. *Nat. Rev. Genet.* **12**, 745-755.
- Bartram, U., Molin, D. G., Wisse, L. J., Mohamad, A., Sanford, L. P., Doetschman, T., Speer, C. P., Poelmann, R. E. and Gittenberger-de Groot, A. C.** (2001). Double-outlet right ventricle and overriding tricuspid valve reflect disturbances of looping, myocardialization, endocardial cushion differentiation, and apoptosis in TGF-beta(2)-knockout mice. *Circulation* **103**, 2745-2752.
- Basson, C. T., Bachinsky, D. R., Lin, R. C., Levi, T., Elkins, J. A., Soultis, J., Grayzel, D., Kroumpouzou, E., Traill, T. A., Leblanc-Straceski, J. et al.** (1997). Mutations in human TBX5 cause limb and cardiac malformation in Holt-Oram syndrome. *Nat. Genet.* **15**, 30-35.
- Beppu, H., Malhotra, R., Beppu, Y., Lepore, J. J., Parmacek, M. S. and Bloch, K. D.** (2009). BMP type II receptor regulates positioning of outflow tract and remodeling of atrioventricular cushion during cardiogenesis. *Dev. Biol.* **331**, 167-175.
- Bleyl, S. B., Saijoh, Y., Bax, N. A., Gittenberger-de Groot, A. C., Wisse, L. J., Chapman, S. C., Hunter, J., Shiratori, H., Hamada, H., Yamada, S. et al.** (2010). Dysregulation of the PDGFRA gene causes inflow tract anomalies including TAPVR: integrating evidence from human genetics and model organisms. *Hum. Mol. Genet.* **19**, 1286-1301.
- Bosman, E. A., Penn, A. C., Ambrose, J. C., Kettleborough, R., Stemple, D. L. and Steel, K. P.** (2005). Multiple mutations in mouse Chd7 provide models for CHARGE syndrome. *Hum. Mol. Genet.* **14**, 3463-3476.
- Boyer, A. S. and Runyan, R. B.** (2001). TGFbeta Type III and TGFbeta Type II receptors have distinct activities during epithelial-mesenchymal cell transformation in the embryonic heart. *Dev. Dyn.* **221**, 454-459.
- Boyer, A. S., Ayerinkas, I. I., Vincent, E. B., McKinney, L. A., Weeks, D. L. and Runyan, R. B.** (1999). TGFbeta2 and TGFbeta3 have separate and sequential activities during epithelial-mesenchymal cell transformation in the embryonic heart. *Dev. Biol.* **208**, 530-545.
- Brannan, C. I., Perkins, A. S., Vogel, K. S., Ratner, N., Nordlund, M. L., Reid, S. W., Buchberg, A. M., Jenkins, N. A., Parada, L. F. and Copeland, N. G.** (1994). Targeted disruption of the neurofibromatosis type-1 gene leads to developmental abnormalities in heart and various neural crest-derived tissues. *Genes Dev.* **8**, 1019-1029.

- Brewer, S., Jiang, X., Donaldson, S., Williams, T. and Sucov, H. M. (2002). Requirement for AP-2alpha in cardiac outflow tract morphogenesis. *Mech. Dev.* **110**, 139-149.
- Brickner, M. E., Hillis, L. D. and Lange, R. A. (2000a). Congenital heart disease in adults. First of two parts. *N. Engl. J. Med.* **342**, 256-263.
- Brickner, M. E., Hillis, L. D. and Lange, R. A. (2000b). Congenital heart disease in adults. Second of two parts. *N. Engl. J. Med.* **342**, 334-342.
- Brown, C. B., Boyer, A. S., Runyan, R. B. and Barnett, J. V. (1996). Antibodies to the Type II TGFbeta receptor block cell activation and migration during atrioventricular cushion transformation in the heart. *Dev. Biol.* **174**, 248-257.
- Brown, C. B., Boyer, A. S., Runyan, R. B. and Barnett, J. V. (1999). Requirement of type III TGF-beta receptor for endocardial cell transformation in the heart. *Science* **283**, 2080-2082.
- Brown, C. B., Feiner, L., Lu, M. M., Li, J., Ma, X., Webber, A. L., Jia, L., Raper, J. A. and Epstein, J. A. (2001). PlexinA2 and semaphorin signaling during cardiac neural crest development. *Development* **128**, 3071-3080.
- Bruneau, B. G., Logan, M., Davis, N., Levi, T., Tabin, C. J., Seidman, J. G. and Seidman, C. E. (1999). Chamber-specific cardiac expression of Tbx5 and heart defects in Holt-Oram syndrome. *Dev. Biol.* **211**, 100-108.
- Bruneau, B. G., Nemer, G., Schmitt, J. P., Charron, F., Robitaille, L., Caron, S., Conner, D. A., Gessler, M., Nemer, M., Seidman, C. E. et al. (2001). A murine model of Holt-Oram syndrome defines roles of the T-box transcription factor Tbx5 in cardiogenesis and disease. *Cell* **106**, 709-721.
- Buckingham, M., Meilhac, S. and Zaffran, S. (2005). Building the mammalian heart from two sources of myocardial cells. *Nat. Rev. Genet.* **6**, 826-837.
- Cai, C. L., Liang, X., Shi, Y., Chu, P. H., Pfaff, S. L., Chen, J. and Evans, S. (2003). Isl1 identifies a cardiac progenitor population that proliferates prior to differentiation and contributes a majority of cells to the heart. *Dev. Cell* **5**, 877-889.
- Chang, C. P. and Bruneau, B. (2012). Epigenetics and cardiovascular development. *Annu. Rev. Physiol.* **74**, 41-68.
- Chang, C. P., Shen, W. F., Rozenfeld, S., Lawrence, H. J., Largman, C. and Cleary, M. L. (1995). Pbx proteins display hexapeptide-dependent cooperative DNA binding with a subset of Hox proteins. *Genes Dev.* **9**, 663-674.
- Chang, C. P., Jacobs, Y., Nakamura, T., Jenkins, N. A., Copeland, N. G. and Cleary, M. L. (1997). Meis proteins are major in vivo DNA binding partners for wild-type but not chimeric Pbx proteins. *Mol. Cell. Biol.* **17**, 5679-5687.
- Chang, C. P., Neilson, J. R., Bayle, J. H., Gestwicki, J. E., Kuo, A., Stankunas, K., Graef, I. A. and Crabtree, G. R. (2004). A field of myocardial-endocardial NFAT signaling underlies heart valve morphogenesis. *Cell* **118**, 649-663.
- Chang, C. P., Stankunas, K., Shang, C., Kao, S. C., Twu, K. Y. and Cleary, M. L. (2008). Pbx1 functions in distinct regulatory networks to pattern the great arteries and cardiac outflow tract. *Development* **135**, 3577-3586.
- Chang, S., McKinsey, T. A., Zhang, C. L., Richardson, J. A., Hill, J. A. and Olson, E. N. (2004). Histone deacetylases 5 and 9 govern responsiveness of the heart to a subset of stress signals and play redundant roles in heart development. *Mol. Cell. Biol.* **24**, 8467-8476.
- Chen, B., Bronson, R. T., Klamon, L. D., Hampton, T. G., Wang, J. F., Green, P. J., Magnuson, T., Douglas, P. S., Morgan, J. P. and Neel, B. G. (2000). Mice mutant for Egfr and Shp2 have defective cardiac semilunar valvulogenesis. *Nat. Genet.* **24**, 296-299.
- Chen, Q., Chen, H., Zheng, D., Kuang, C., Fang, H., Zou, B., Zhu, W., Bu, G., Jin, T., Wang, Z. et al. (2009). Smad7 is required for the development and function of the heart. *J. Biol. Chem.* **284**, 292-300.
- Chen, Y. H., Ishii, M., Sun, J., Sucov, H. M. and Maxson, R. E., Jr (2007). Msx1 and Msx2 regulate survival of secondary heart field precursors and post-migratory proliferation of cardiac neural crest in the outflow tract. *Dev. Biol.* **308**, 421-437.
- Cheng, H. L., Mostoslavsky, R., Saito, S., Manis, J. P., Gu, Y., Patel, P., Bronson, R., Appella, E., Alt, F. W. and Chua, K. F. (2003). Developmental defects and p53 hyperacetylation in Sir2 homolog (SIRT1)-deficient mice. *Proc. Natl. Acad. Sci. USA* **100**, 10794-10799.
- Chisaka, O. and Capecchi, M. R. (1991). Regionally restricted developmental defects resulting from targeted disruption of the mouse homeobox gene hox-1.5. *Nature* **350**, 473-479.
- Choudhary, B., Ito, Y., Makita, T., Sasaki, T., Chai, Y. and Sucov, H. M. (2006). Cardiovascular malformations with normal smooth muscle differentiation in neural crest-specific type II TGFbeta receptor (Tgfb2) mutant mice. *Dev. Biol.* **289**, 420-429.
- Christoffels, V. M., Hoogaars, W. M., Tessari, A., Clout, D. E., Moorman, A. F. and Campione, M. (2004). T-box transcription factor Tbx2 represses differentiation and formation of the cardiac chambers. *Dev. Dyn.* **229**, 763-770.
- Clouthier, D. E., Hosoda, K., Richardson, J. A., Williams, S. C., Yanagisawa, H., Kuwaki, T., Kumada, M., Hammer, R. E. and Yanagisawa, M. (1998). Cranial and cardiac neural crest defects in endothelin-A receptor-deficient mice. *Development* **125**, 813-824.
- Combs, M. D. and Yutzey, K. E. (2009). Heart valve development: regulatory networks in development and disease. *Circ. Res.* **105**, 408-421.
- Conway, S. J., Henderson, D. J. and Copp, A. J. (1997). Pax3 is required for cardiac neural crest migration in the mouse: evidence from the splotch (Sp2H) mutant. *Development* **124**, 505-514.
- Cooley, M. A., Kern, C. B., Fresco, V. M., Wessels, A., Thompson, R. P., McQuinn, T. C., Twaal, W. O., Mjaatvedt, C. H., Drake, C. J. and Argraves, W. S. (2008). Fibulin-1 is required for morphogenesis of neural crest-derived structures. *Dev. Biol.* **319**, 336-345.
- Costell, M., Carmona, R., Gustafsson, E., González-Iriarte, M., Fässler, R. and Muñoz-Chápuli, R. (2002). Hyperplastic conotruncal endocardial cushions and transposition of great arteries in perlecan-null mice. *Circ. Res.* **91**, 158-164.
- Crispino, J. D., Lodish, M. B., Thurberg, B. L., Litovsky, S. H., Collins, T., Molkentin, J. D. and Orkin, S. H. (2001). Proper coronary vascular development and heart morphogenesis depend on interaction of GATA-4 with FOG cofactors. *Genes Dev.* **15**, 839-844.
- de la Pompa, J. L., Timmerman, L. A., Takimoto, H., Yoshida, H., Elia, A. J., Samper, E., Potter, J., Wakeham, A., Marengere, L., Langille, B. L. et al. (1998). Role of the NF-ATc transcription factor in morphogenesis of cardiac valves and septum. *Nature* **392**, 182-186.
- de Lange, F. J., Moorman, A. F., Anderson, R. H., Männer, J., Soufan, A. T., de Gier-de Vries, C., Schneider, M. D., Webb, S., van den Hoff, M. J. and Christoffels, V. M. (2004). Lineage and morphogenetic analysis of the cardiac valves. *Circ. Res.* **95**, 645-654.
- Délot, E. C., Bahamonde, M. E., Zhao, M. and Lyons, K. M. (2003). BMP signaling is required for septation of the outflow tract of the mammalian heart. *Development* **130**, 209-220.
- Donovan, J., Kordylewska, A., Jan, Y. N. and Utset, M. F. (2002). Tetralogy of fallot and other congenital heart defects in Hey2 mutant mice. *Curr. Biol.* **12**, 1605-1610.
- Dor, Y., Camenisch, T. D., Itin, A., Fishman, G. I., McDonald, J. A., Carmeliet, P. and Keshet, E. (2001). A novel role for VEGF in endocardial cushion formation and its potential contribution to congenital heart defects. *Development* **128**, 1531-1538.
- Dor, Y., Klewer, S. E., McDonald, J. A., Keshet, E. and Camenisch, T. D. (2003). VEGF modulates early heart valve formation. *Anat. Rec. A Discov. Mol. Cell. Evol. Biol.* **271**, 202-208.
- Dünker, N. and Kriegelstein, K. (2002). Tgfbeta2 -/- Tgfbeta3 -/- double knockout mice display severe midline fusion defects and early embryonic lethality. *Anat. Embryol. (Berl.)* **206**, 73-83.
- Eisenberg, L. M. and Markwald, R. R. (1995). Molecular regulation of atrioventricular valvuloseptal morphogenesis. *Circ. Res.* **77**, 1-6.
- Eldadah, Z. A., Hamosh, A., Biery, N. J., Montgomery, R. A., Duke, M., Elkins, R. and Dietz, H. C. (2001). Familial Tetralogy of Fallot caused by mutation in the jagged1 gene. *Hum. Mol. Genet.* **10**, 163-169.
- Epstein, D. J., Vekemans, M. and Gros, P. (1991). Splotch (Sp2H), a mutation affecting development of the mouse neural tube, shows a deletion within the paired homeodomain of Pax-3. *Cell* **67**, 767-774.
- Epstein, J. A. (1996). Pax3, neural crest and cardiovascular development. *Trends Cardiovasc. Med.* **6**, 255-260.
- Epstein, J. A., Li, J., Lang, D., Chen, F., Brown, C. B., Jin, F., Lu, M. M., Thomas, M., Liu, E., Wessels, A. et al. (2000). Migration of cardiac neural crest cells in Splotch embryos. *Development* **127**, 1869-1878.
- Erickson, S. L., O'Shea, K. S., Ghaboosi, N., Loverro, L., Frantz, G., Bauer, M., Lu, L. H. and Moore, M. W. (1997). ErbB3 is required for normal cerebellar and cardiac development: a comparison with ErbB2- and heregulin-deficient mice. *Development* **124**, 4999-5011.
- Etheridge, S. L., Ray, S., Li, S., Hamblet, N. S., Lijam, N., Tsang, M., Greer, J., Kardos, N., Wang, J., Sussman, D. J. et al. (2008). Murine dishevelled 3 functions in redundant pathways with dishevelled 1 and 2 in normal cardiac outflow tract, cochlea, and neural tube development. *PLoS Genet.* **4**, e1000259.
- Feiner, L., Webber, A. L., Brown, C. B., Lu, M. M., Jia, L., Feinstein, P., Mombaerts, P., Epstein, J. A. and Raper, J. A. (2001). Targeted disruption of semaphorin 3C leads to persistent truncus arteriosus and aortic arch interruption. *Development* **128**, 3061-3070.
- Fischer, A., Klamt, B., Schumacher, N., Glaeser, C., Hansmann, I., Fenge, H. and Gessler, M. (2004). Phenotypic variability in Hey2 -/- mice and absence of HEY2 mutations in patients with congenital heart defects or Alagille syndrome. *Mamm. Genome* **15**, 711-716.
- Fish, J. E., Santoro, M. M., Morton, S. U., Yu, S., Yeh, R. F., Wythe, J. D., Ivey, K. N., Bruneau, B. G., Stainier, D. Y. and Srivastava, D. (2008). miR-126 regulates angiogenic signaling and vascular integrity. *Dev. Cell* **15**, 272-284.
- Fong, G. H., Rossant, J., Gertsenstein, M. and Breitman, M. L. (1995). Role of the Flt-1 receptor tyrosine kinase in regulating the assembly of vascular endothelium. *Nature* **376**, 66-70.
- Fraisse, A., Massih, T. A., Kreitmam, B., Metras, D., Vouhé, P., Sidi, D. and Bonnet, D. (2003). Characteristics and management of cleft mitral valve. *J. Am. Coll. Cardiol.* **42**, 1988-1993.
- Friedman, J. M., Arbiser, J., Epstein, J. A., Gutmann, D. H., Huot, S. J., Lin, A. E., McManus, B. and Korf, B. R. (2002). Cardiovascular disease in neurofibromatosis 1: Report of the NF1 Cardiovascular Task Force. *Genet. Med.* **4**, 105-111.



- Galli, D., Domínguez, J. N., Zaffran, S., Munk, A., Brown, N. A. and Buckingham, M. E. (2008). Atrial myocardium derives from the posterior region of the second heart field, which acquires left-right identity as *Pitx2c* is expressed. *Development* **135**, 1157-1167.
- Galvin, K. M., Donovan, M. J., Lynch, C. A., Meyer, R. I., Paul, R. J., Lorenz, J. N., Fairchild-Huntress, V., Dixon, K. L., Dunmore, J. H., Gimbrone, M. A., Jr et al. (2000). A role for *smad6* in development and homeostasis of the cardiovascular system. *Nat. Genet.* **24**, 171-174.
- Gao, Z., Kim, G. H., Mackinnon, A. C., Flagg, A. E., Bassett, B., Earley, J. U. and Svensson, E. C. (2010). *Ets1* is required for proper migration and differentiation of the cardiac neural crest. *Development* **137**, 1543-1551.
- Garg, V. (2006). Molecular genetics of aortic valve disease. *Curr. Opin. Cardiol.* **21**, 180-184.
- Garg, V., Kathiriyai, I. S., Barnes, R., Schluterman, M. K., King, I. N., Butler, C. A., Rothrock, C. R., Eapen, R. S., Hirayama-Yamada, K., Joo, K. et al. (2003). *GATA4* mutations cause human congenital heart defects and reveal an interaction with *TBX5*. *Nature* **424**, 443-447.
- Garg, V., Muth, A. N., Ransom, J. F., Schluterman, M. K., Barnes, R., King, I. N., Grossfeld, P. D. and Srivastava, D. (2005). Mutations in *NOTCH1* cause aortic valve disease. *Nature* **437**, 270-274.
- Gassmann, M., Casagrande, F., Orioli, D., Simon, H., Lai, C., Klein, R. and Lemke, G. (1995). Aberrant neural and cardiac development in mice lacking the *ErbB4* neuregulin receptor. *Nature* **378**, 390-394.
- Gitler, A. D., Zhu, Y., Ismat, F. A., Lu, M. M., Yamauchi, Y., Parada, L. F. and Epstein, J. A. (2003). *Nf1* has an essential role in endothelial cells. *Nat. Genet.* **33**, 75-79.
- Gitler, A. D., Lu, M. M. and Epstein, J. A. (2004). *PlexinD1* and semaphorin signaling are required in endothelial cells for cardiovascular development. *Dev. Cell* **7**, 107-116.
- Goddeeris, M. M., Schwartz, R., Klingensmith, J. and Meyers, E. N. (2007). Independent requirements for Hedgehog signaling by both the anterior heart field and neural crest cells for outflow tract development. *Development* **134**, 1593-1604.
- Goddeeris, M. M., Rho, S., Petiet, A., Davenport, C. L., Johnson, G. A., Meyers, E. N. and Klingensmith, J. (2008). Intracardiac septation requires hedgehog-dependent cellular contributions from outside the heart. *Development* **135**, 1887-1895.
- Greenway, S. C., Pereira, A. C., Lin, J. C., DePalma, S. R., Israel, S. J., Mesquita, S. M., Ergul, E., Conta, J. H., Korn, J. M., McCarroll, S. A. et al. (2009). De novo copy number variants identify new genes and loci in isolated sporadic tetralogy of Fallot. *Nat. Genet.* **41**, 931-935.
- Greulich, F., Rudat, C. and Kispert, A. (2011). Mechanisms of T-box gene function in the developing heart. *Cardiovasc. Res.* **91**, 212-222.
- Gruber, P. J., Kubalak, S. W., Pexieder, T., Sucov, H. M., Evans, R. M. and Chien, K. R. (1996). *RXR* alpha deficiency confers genetic susceptibility for aortic sac, conotruncal, atrioventricular cushion, and ventricular muscle defects in mice. *J. Clin. Invest.* **98**, 1332-1343.
- Habets, P. E., Moorman, A. F., Clout, D. E., van Roon, M. A., Lingbeek, M., van Lohuizen, M., Campione, M. and Christoffels, V. M. (2002). Cooperative action of *Tbx2* and *Nkx2.5* inhibits ANF expression in the atrioventricular canal: implications for cardiac chamber formation. *Genes Dev.* **16**, 1234-1246.
- Hakim, Z. S., DiMichele, L. A., Doherty, J. T., Homeister, J. W., Beggs, H. E., Reichardt, L. F., Schwartz, R. J., Brackhan, J., Smithies, O., Mack, C. P. et al. (2007). Conditional deletion of focal adhesion kinase leads to defects in ventricular septation and outflow tract alignment. *Mol. Cell. Biol.* **27**, 5352-5364.
- Han, P., Hang, C. T., Yang, J. and Chang, C. P. (2011). Chromatin remodeling in cardiovascular development and physiology. *Circ. Res.* **108**, 378-396.
- Hang, C. T., Yang, J., Han, P., Cheng, H. L., Shang, C., Ashley, E., Zhou, B. and Chang, C. P. (2010). Chromatin regulation by *Brg1* underlies heart muscle development and disease. *Nature* **466**, 62-67.
- Harrelson, Z., Kelly, R. G., Goldin, S. N., Gibson-Brown, J. J., Bollag, R. J., Silver, L. M. and Papaioannou, V. E. (2004). *Tbx2* is essential for patterning the atrioventricular canal and for morphogenesis of the outflow tract during heart development. *Development* **131**, 5041-5052.
- Harris, I. S. and Black, B. L. (2010). Development of the endocardium. *Pediatr. Cardiol.* **31**, 391-399.
- High, F. and Epstein, J. A. (2007). Signalling pathways regulating cardiac neural crest migration and differentiation. *Novartis Found. Symp.* **283**, 238-241.
- High, F. A., Zhang, M., Proweller, A., Tu, L., Parmacek, M. S., Pear, W. S. and Epstein, J. A. (2007). An essential role for *Notch* in neural crest during cardiovascular development and smooth muscle differentiation. *J. Clin. Invest.* **117**, 353-363.
- High, F. A., Jain, R., Stoller, J. Z., Antonucci, N. B., Lu, M. M., Loomes, K. M., Kaestner, K. H., Pear, W. S. and Epstein, J. A. (2009). Murine *Jagged1/Notch* signaling in the second heart field orchestrates *Fgf8* expression and tissue-tissue interactions during outflow tract development. *J. Clin. Invest.* **119**, 1986-1996.
- Hoffman, J. I. (1995). Incidence of congenital heart disease: II. Prenatal incidence. *Pediatr. Cardiol.* **16**, 103-113.
- Hoffman, J. I. and Kaplan, S. (2002). The incidence of congenital heart disease. *J. Am. Coll. Cardiol.* **39**, 1890-1900.
- Hofstra, R. M., Valdenaire, O., Arch, E., Osinga, J., Kroes, H., Löffler, B. M., Hamosh, A., Meijers, C. and Buys, C. H. (1999). A loss-of-function mutation in the endothelin-converting enzyme 1 (*ECE-1*) associated with Hirschsprung disease, cardiac defects, and autonomic dysfunction. *Am. J. Hum. Genet.* **64**, 304-307.
- Huang, Z. P., Chen, J. F., Regan, J. N., Maguire, C. T., Tang, R. H., Dong, X. R., Majesky, M. W. and Wang, D. Z. (2010). Loss of microRNAs in neural crest leads to cardiovascular syndromes resembling human congenital heart defects. *Arterioscler. Thromb. Vasc. Biol.* **30**, 2575-2586.
- Huh, S. H. and Ornitz, D. M. (2010). Beta-catenin deficiency causes DiGeorge syndrome-like phenotypes through regulation of *Tbx1*. *Development* **137**, 1137-1147.
- Hurler, J. M., Colvée, E. and Blanco, A. M. (1980). Development of mouse semilunar valves. *Anat. Embryol. (Berl.)* **160**, 83-91.
- Iwamoto, R., Yamazaki, S., Asakura, M., Takashima, S., Hasuwa, H., Miyado, K., Adachi, S., Kitakaze, M., Hashimoto, K., Raab, G. et al. (2003). Heparin-binding EGF-like growth factor and *ErbB* signaling is essential for heart function. *Proc. Natl. Acad. Sci. USA* **100**, 3221-3226.
- Jackson, L. F., Qiu, T. H., Sunnarborg, S. W., Chang, A., Zhang, C., Patterson, C. and Lee, D. C. (2003). Defective valvulogenesis in *HB-EGF* and *TACE*-null mice is associated with aberrant BMP signaling. *EMBO J.* **22**, 2704-2716.
- Jain, R., Engleka, K. A., Rentschler, S. L., Manderfield, L. J., Li, L., Yuan, L. and Epstein, J. A. (2011). Cardiac neural crest orchestrates remodeling and functional maturation of mouse semilunar valves. *J. Clin. Invest.* **121**, 422-430.
- Jerome, L. A. and Papaioannou, V. E. (2001). DiGeorge syndrome phenotype in mice mutant for the T-box gene, *Tbx1*. *Nat. Genet.* **27**, 286-291.
- Jia, Q., McDill, B. W., Li, S. Z., Deng, C., Chang, C. P. and Chen, F. (2007). *Smad* signaling in the neural crest regulates cardiac outflow tract remodeling through cell autonomous and non-cell autonomous effects. *Dev. Biol.* **311**, 172-184.
- Jiang, X., Rowitch, D. H., Soriano, P., McMahon, A. P. and Sucov, H. M. (2000). Fate of the mammalian cardiac neural crest. *Development* **127**, 1607-1616.
- Jiang, X., Choudhary, B., Merki, E., Chien, K. R., Maxson, R. E. and Sucov, H. M. (2002). Normal fate and altered function of the cardiac neural crest cell lineage in retinoic acid receptor mutant embryos. *Mech. Dev.* **117**, 115-122.
- Jiao, K., Kulesha, H., Tompkins, K., Zhou, Y., Batts, L., Baldwin, H. S. and Hogan, B. L. (2003). An essential role of *Bmp4* in the atrioventricular septation of the mouse heart. *Genes Dev.* **17**, 2362-2367.
- Jiao, K., Langworthy, M., Batts, L., Brown, C. B., Moses, H. L. and Baldwin, H. S. (2006). *Tgfbeta* signaling is required for atrioventricular cushion mesenchyme remodeling during in vivo cardiac development. *Development* **133**, 4585-4593.
- Kaartinen, V., Voncken, J. W., Shuler, C., Warburton, D., Bu, D., Heisterkamp, N. and Groffen, J. (1995). Abnormal lung development and cleft palate in mice lacking *TGF-beta 3* indicates defects of epithelial-mesenchymal interaction. *Nat. Genet.* **11**, 415-421.
- Kaartinen, V., Dudas, M., Nagy, A., Sridurongrit, S., Lu, M. M. and Epstein, J. A. (2004). Cardiac outflow tract defects in mice lacking *ALK2* in neural crest cells. *Development* **131**, 3481-3490.
- Kamp, A., Peterson, M. A., Svenson, K. L., Bjork, B. C., Hentges, K. E., Rajapaksha, T. W., Moran, J., Justice, M. J., Seidman, J. G., Seidman, C. E. et al. (2010). Genome-wide identification of mouse congenital heart disease loci. *Hum. Mol. Genet.* **19**, 3105-3113.
- Kanzaki-Kato, N., Tamakoshi, T., Fu, Y., Chandra, A., Itakura, T., Uezato, T., Tanaka, T., Clouthier, D. E., Sugiyama, T., Yanagisawa, M. et al. (2005). Roles of forkhead transcription factor *Foxc2* (*MFH-1*) and endothelin receptor A in cardiovascular morphogenesis. *Cardiovasc. Res.* **65**, 711-718.
- Kelly, R. G., Brown, N. A. and Buckingham, M. E. (2001). The arterial pole of the mouse heart forms from *Fgf10*-expressing cells in pharyngeal mesoderm. *Dev. Cell* **1**, 435-440.
- Kim, R. Y., Robertson, E. J. and Solloway, M. J. (2001). *Bmp6* and *Bmp7* are required for cushion formation and septation in the developing mouse heart. *Dev. Biol.* **235**, 449-466.
- Kioussi, C., Briata, P., Baek, S. H., Rose, D. W., Hamblet, N. S., Herman, T., Ohgi, K. A., Lin, C., Gleiberman, A., Wang, J. et al. (2002). Identification of a *Wnt/Dvl/beta-Catenin* → *Pitx2* pathway mediating cell-type-specific proliferation during development. *Cell* **111**, 673-685.
- Kirby, M. L., Gale, T. F. and Stewart, D. E. (1983). Neural crest cells contribute to normal aorticopulmonary septation. *Science* **220**, 1059-1061.
- Kirk, E. P., Sunde, M., Costa, M. W., Rankin, S. A., Wolstein, O., Castro, M. L., Butler, T. L., Hyun, C., Guo, G., Otway, R. et al. (2007). Mutations in cardiac T-box factor gene *TBX20* are associated with diverse cardiac pathologies, including defects of septation and valvulogenesis and cardiomyopathy. *Am. J. Hum. Genet.* **81**, 280-291.
- Kitamura, K., Miura, H., Miyagawa-Tomita, S., Yanazawa, M., Katoh-Fukui, Y., Suzuki, R., Ohuchi, H., Suehiro, A., Motegi, Y., Nakahara, Y. et al. (1999). Mouse *Pitx2* deficiency leads to anomalies of the ventral body wall,

- heart, extra- and pericardial mesoderm and right pulmonary isomerism. *Development* **126**, 5749-5758.
- Kodo, K., Nishizawa, T., Furutani, M., Arai, S., Yamamura, E., Joo, K., Takahashi, T., Matsuoka, R. and Yamagishi, H.** (2009). GATA6 mutations cause human cardiac outflow tract defects by disrupting semaphorin-plexin signaling. *Proc. Natl. Acad. Sci. USA* **106**, 13933-13938.
- Krantz, I. D., Smith, R., Colliton, R. P., Tinkel, H., Zackai, E. H., Piccoli, D. A., Goldmuntz, E. and Spinner, N. B.** (1999). Jagged1 mutations in patients ascertained with isolated congenital heart defects. *Am. J. Med. Genet.* **84**, 56-60.
- Kurihara, Y., Kurihara, H., Oda, H., Maemura, K., Nagai, R., Ishikawa, T. and Yazaki, Y.** (1995). Aortic arch malformations and ventricular septal defect in mice deficient in endothelin-1. *J. Clin. Invest.* **96**, 293-300.
- Kwang, S. J., Brugger, S. M., Lazik, A., Merrill, A. E., Wu, L. Y., Liu, Y. H., Ishii, M., Sangiorgi, F. O., Rauchman, M., Sucov, H. M. et al.** (2002). Msx2 is an immediate downstream effector of Pax3 in the development of the murine cardiac neural crest. *Development* **129**, 527-538.
- Laforest, B., Andelfinger, G. and Nemer, M.** (2011). Loss of Gata5 in mice leads to bicuspid aortic valve. *J. Clin. Invest.* **121**, 2876-2887.
- Lakkis, M. M. and Epstein, J. A.** (1998). Neurofibromin modulation of ras activity is required for normal endocardial-mesenchymal transformation in the developing heart. *Development* **125**, 4359-4367.
- Lange, A. W., Molkentin, J. D. and Yutzey, K. E.** (2004). DSCR1 gene expression is dependent on NFATc1 during cardiac valve formation and colocalizes with anomalous organ development in trisomy 16 mice. *Dev. Biol.* **266**, 346-360.
- Langlois, D., Hneino, M., Bouazza, L., Parlakian, A., Sasaki, T., Bricca, G. and Li, J. Y.** (2010). Conditional inactivation of TGF- $\beta$  type II receptor in smooth muscle cells and epicardium causes lethal aortic and cardiac defects. *Transgenic Res.* **19**, 1069-1082.
- Lawson, K. A., Meneses, J. J. and Pedersen, R. A.** (1991). Clonal analysis of epiblast fate during germ layer formation in the mouse embryo. *Development* **113**, 891-911.
- Lee, K. F., Simon, H., Chen, H., Bates, B., Hung, M. C. and Hauser, C.** (1995). Requirement for neuregulin receptor erbB2 in neural and cardiac development. *Nature* **378**, 394-398.
- Lee, R. Y., Luo, J., Evans, R. M., Giguere, V. and Sucov, H. M.** (1997). Compartment-selective sensitivity of cardiovascular morphogenesis to combinations of retinoic acid receptor gene mutations. *Circ. Res.* **80**, 757-764.
- Lee, T. C., Zhao, Y. D., Courtman, D. W. and Stewart, D. J.** (2000). Abnormal aortic valve development in mice lacking endothelial nitric oxide synthase. *Circulation* **101**, 2345-2348.
- Lee, Y., Song, A. J., Baker, R., Micales, B., Conway, S. J. and Lyons, G. E.** (2000). Jumonji, a nuclear protein that is necessary for normal heart development. *Circ. Res.* **86**, 932-938.
- Lepore, J. J., Mericko, P. A., Cheng, L., Lu, M. M., Morrissey, E. E. and Parmacek, M. S.** (2006). GATA-6 regulates semaphorin 3C and is required in cardiac neural crest for cardiovascular morphogenesis. *J. Clin. Invest.* **116**, 929-939.
- Li, D., Hallett, M. A., Zhu, W., Rubart, M., Liu, Y., Yang, Z., Chen, H., Haneline, L. S., Chan, R. J., Schwartz, R. J. et al.** (2011). Dishevelled-associated activator of morphogenesis 1 (Daam1) is required for heart morphogenesis. *Development* **138**, 303-315.
- Li, J., Chen, F. and Epstein, J. A.** (2000). Neural crest expression of Cre recombinase directed by the proximal Pax3 promoter in transgenic mice. *Genesis* **26**, 162-164.
- Li, P., Pashmforoush, M. and Sucov, H. M.** (2010). Retinoic acid regulates differentiation of the secondary heart field and TGF $\beta$ -mediated outflow tract septation. *Dev. Cell* **18**, 480-485.
- Li, Q.-Y., Newbury-Ecob, R. A., Terrett, J. A., Wilson, D. I., Curtis, A. R., Yi, C. H., Gebuhr, T., Bullen, P. J., Robson, S. C., Strachan, T. et al.** (1997). Holt-Oram syndrome is caused by mutations in TBX5, a member of the Brachyury (T) gene family. *Nat. Genet.* **15**, 21-29.
- Liebner, S., Cattelino, A., Gallini, R., Rudini, N., Iurlaro, M., Piccolo, S. and Dejana, E.** (2004). Beta-catenin is required for endothelial-mesenchymal transformation during heart cushion development in the mouse. *J. Cell Biol.* **166**, 359-367.
- Lin, C. Y., Lin, C. J., Chen, C. H., Chen, R. M., Zhou, B. and Chang, C. P.** (2012). The secondary heart field is a new site of calcineurin/Nfat1 signaling for semilunar valve development. *J. Mol. Cell. Cardiol.* **52**, 1096-1102.
- Lin, L., Bu, L., Cai, C. L., Zhang, X. and Evans, S.** (2006). Isl1 is upstream of sonic hedgehog in a pathway required for cardiac morphogenesis. *Dev. Biol.* **295**, 756-763.
- Lin, L., Cui, L., Zhou, W., Duford, D., Zhang, X., Cai, C. L., Bu, L., Yang, L., Martin, J., Kemler, R. et al.** (2007). Beta-catenin directly regulates Islet1 expression in cardiovascular progenitors and is required for multiple aspects of cardiogenesis. *Proc. Natl. Acad. Sci. USA* **104**, 9313-9318.
- Lindsay, E. A., Vitelli, F., Su, H., Morishima, M., Huynh, T., Pramparo, T., Jurecic, V., Ogunrinu, G., Sutherland, H. F., Scambler, P. J. et al.** (2001). Tbx1 haploinsufficiency in the DiGeorge syndrome region causes aortic arch defects in mice. *Nature* **410**, 97-101.
- Lines, M. A., Kozlowski, K. and Walter, M. A.** (2002). Molecular genetics of Axenfeld-Rieger malformations. *Hum. Mol. Genet.* **11**, 1177-1187.
- Liu, C., Shen, A., Li, X., Jiao, W., Zhang, X. and Li, Z.** (2008). T-box transcription factor TBX20 mutations in Chinese patients with congenital heart disease. *Eur. J. Med. Genet.* **51**, 580-587.
- Liu, N., Bezprozvannaya, S., Williams, A. H., Qi, X., Richardson, J. A., Bassel-Duby, R. and Olson, E. N.** (2008). microRNA-133a regulates cardiomyocyte proliferation and suppresses smooth muscle gene expression in the heart. *Genes Dev.* **22**, 3242-3254.
- Liu, W., Selever, J., Wang, D., Lu, M. F., Moses, K. A., Schwartz, R. J. and Martin, J. F.** (2004). Bmp4 signaling is required for outflow-tract septation and branchial-arch artery remodeling. *Proc. Natl. Acad. Sci. USA* **101**, 4489-4494.
- Luna-Zurita, L., Prados, B., Grego-Bessa, J., Luxán, G., del Monte, G., Benguría, A., Adams, R. H., Pérez-Pomares, J. M. and de la Pompa, J. L.** (2010). Integration of a Notch-dependent mesenchymal gene program and Bmp2-driven cell invasiveness regulates murine cardiac valve formation. *J. Clin. Invest.* **120**, 3493-3507.
- Luo, Y., High, F. A., Epstein, J. A. and Radice, G. L.** (2006). N-cadherin is required for neural crest remodeling of the cardiac outflow tract. *Dev. Biol.* **299**, 517-528.
- Ma, L., Lu, M. F., Schwartz, R. J. and Martin, J. F.** (2005). Bmp2 is essential for cardiac cushion epithelial-mesenchymal transition and myocardial patterning. *Development* **132**, 5601-5611.
- MacGrogan, D., Nus, M. and de la Pompa, J. L.** (2010). Notch signaling in cardiac development and disease. *Curr. Top. Dev. Biol.* **92**, 333-365.
- Maitra, M., Schluterman, M. K., Nichols, H. A., Richardson, J. A., Lo, C. W., Srivastava, D. and Garg, V.** (2009). Interaction of Gata4 and Gata6 with Tbx5 is critical for normal cardiac development. *Dev. Biol.* **326**, 368-377.
- Männer, J., Pérez-Pomares, J. M., Macías, D. and Muñoz-Chápuli, R.** (2001). The origin, formation and developmental significance of the epicardium: a review. *Cells Tissues Organs* **169**, 89-103.
- McBride, K. L., Riley, M. F., Zender, G. A., Fitzgerald-Butt, S. M., Towbin, J. A., Belmont, J. W. and Cole, S. E.** (2008). NOTCH1 mutations in individuals with left ventricular outflow tract malformations reduce ligand-induced signaling. *Hum. Mol. Genet.* **17**, 2886-2893.
- McCright, B., Lozier, J. and Gridley, T.** (2002). A mouse model of Alagille syndrome: Notch2 as a genetic modifier of Jag1 haploinsufficiency. *Development* **129**, 1075-1082.
- McCulley, D. J., Kang, J. O., Martin, J. F. and Black, B. L.** (2008). BMP4 is required in the anterior heart field and its derivatives for endocardial cushion remodeling, outflow tract septation, and semilunar valve development. *Dev. Dyn.* **237**, 3200-3209.
- McDaniell, R., Warthen, D. M., Sanchez-Lara, P. A., Pai, A., Krantz, I. D., Piccoli, D. A. and Spinner, N. B.** (2006). NOTCH2 mutations cause Alagille syndrome, a heterogeneous disorder of the notch signaling pathway. *Am. J. Hum. Genet.* **79**, 169-173.
- McKellar, S. H., Tester, D. J., Yagubyan, M., Majumdar, R., Ackerman, M. J. and Sundt, T. M., 3rd** (2007). Novel NOTCH1 mutations in patients with bicuspid aortic valve disease and thoracic aortic aneurysms. *J. Thorac. Cardiovasc. Surg.* **134**, 290-296.
- Meneghini, V., Odent, S., Platonova, N., Egeo, A. and Merlo, G. R.** (2006). Novel TBX3 mutation data in families with ulnar-mammary syndrome indicate a genotype-phenotype relationship: mutations that do not disrupt the T-domain are associated with less severe limb defects. *Eur. J. Med. Genet.* **49**, 151-158.
- Merki, E., Zamora, M., Raya, A., Kawakami, Y., Wang, J., Zhang, X., Burch, J., Kubalak, S. W., Kaliman, P., Izpisua Belmonte, J. C. et al.** (2005). Epicardial retinoid X receptor alpha is required for myocardial growth and coronary artery formation. *Proc. Natl. Acad. Sci. USA* **102**, 18455-18460.
- Merscher, S., Funke, B., Epstein, J. A., Heyer, J., Puech, A., Lu, M. M., Xavier, R. J., Demay, M. B., Russell, R. G., Factor, S. et al.** (2001). TBX1 is responsible for cardiovascular defects in velo-cardio-facial/DiGeorge syndrome. *Cell* **104**, 619-629.
- Mesbah, K., Harrelson, Z., Théveniau-Ruissy, M., Papaioannou, V. E. and Kelly, R. G.** (2008). Tbx3 is required for outflow tract development. *Circ. Res.* **103**, 743-750.
- Meyer, D. and Birchmeier, C.** (1995). Multiple essential functions of neuregulin in development. *Nature* **378**, 386-390.
- Milgrom-Hoffman, M., Harrelson, Z., Ferrara, N., Zelzer, E., Evans, S. M. and Tzahor, E.** (2011). The heart endocardium is derived from vascular endothelial progenitors. *Development* **138**, 4777-4787.
- Millan, F. A., Denhez, F., Kondaiah, P. and Akhurst, R. J.** (1991). Embryonic gene expression patterns of TGF beta 1, beta 2 and beta 3 suggest different developmental functions in vivo. *Development* **111**, 131-143.
- Mjaatvedt, C. H., Nakaoka, T., Moreno-Rodriguez, R., Norris, R. A., Kern, M. J., Eisenberg, C. A., Turner, D. and Markwald, R. R.** (2001). The outflow tract of the heart is recruited from a novel heart-forming field. *Dev. Biol.* **238**, 97-109.
- Mommersteeg, M. T., Soufan, A. T., de Lange, F. J., van den Hoff, M. J., Anderson, R. H., Christoffels, V. M. and Moorman, A. F.** (2006). Two distinct



- pools of mesenchyme contribute to the development of the atrial septum. *Circ. Res.* **99**, 351-353.
- Moorman, A., Webb, S., Brown, N. A., Lamers, W. and Anderson, R. H.** (2003). Development of the heart: (1) formation of the cardiac chambers and arterial trunks. *Heart* **89**, 806-814.
- Morikawa, Y. and Cserjesi, P.** (2008). Cardiac neural crest expression of Hand2 regulates outflow and second heart field development. *Circ. Res.* **103**, 1422-1429.
- Morimoto, M., Liu, Z., Cheng, H. T., Winters, N., Bader, D. and Kopan, R.** (2010). Canonical Notch signaling in the developing lung is required for determination of arterial smooth muscle cells and selection of Clara versus ciliated cell fate. *J. Cell Sci.* **123**, 213-224.
- Moskowitz, I. P., Wang, J., Peterson, M. A., Pu, W. T., Mackinnon, A. C., Oxburgh, L., Chu, G. C., Sarkar, M., Berul, C., Smoot, L. et al.** (2011). Transcription factor genes *Smad4* and *Gata4* cooperatively regulate cardiac valve development. *Proc. Natl. Acad. Sci. USA* **108**, 4006-4011.
- Musunuru, K., Strong, A., Frank-Kamenetsky, M., Lee, N. E., Ahfeldt, T., Sachs, K. V., Li, X., Li, H., Kuperwasser, N., Ruda, V. M. et al.** (2010). From noncoding variant to phenotype via SORT1 at the 1p13 cholesterol locus. *Nature* **466**, 714-719.
- Nadeau, M., Georges, R. O., Laforest, B., Yamak, A., Lefebvre, C., Beaugerard, J., Paradis, P., Bruneau, B. G., Andelfinger, G. and Nemer, M.** (2010). An endocardial pathway involving *Tbx5*, *Gata4*, and *Nos3* required for atrial septum formation. *Proc. Natl. Acad. Sci. USA* **107**, 19356-19361.
- Nagy, I. I., Railo, A., Rapila, R., Hast, T., Sormunen, R., Tavi, P., Räsänen, J. and Vainio, S. J.** (2010). Wnt-11 signalling controls ventricular myocardium development by patterning N-cadherin and beta-catenin expression. *Cardiovasc. Res.* **85**, 100-109.
- Nakajima, M., Moriizumi, E., Koseki, H. and Shirasawa, T.** (2004). Presenilin 1 is essential for cardiac morphogenesis. *Dev. Dyn.* **230**, 795-799.
- Nakamura, T., Gulick, J., Colbert, M. C. and Robbins, J.** (2009). Protein tyrosine phosphatase activity in the neural crest is essential for normal heart and skull development. *Proc. Natl. Acad. Sci. USA* **106**, 11270-11275.
- Neel, B. G., Gu, H. and Pao, L.** (2003). The 'Shp'ing news: SH2 domain-containing tyrosine phosphatases in cell signaling. *Trends Biochem. Sci.* **28**, 284-293.
- Nelms, B. L., Pfaltzgraff, E. R. and Labosky, P. A.** (2011). Functional interaction between *Foxd3* and *Pax3* in cardiac neural crest development. *Genesis* **49**, 10-23.
- Ng, A., Wong, M., Viviano, B., Erlich, J. M., Alba, G., Pfloderer, C., Jay, P. Y. and Saunders, S.** (2009). Loss of glypican-3 function causes growth factor-dependent defects in cardiac and coronary vascular development. *Dev. Biol.* **335**, 208-215.
- Ng, S. B., Bigam, A. W., Buckingham, K. J., Hannibal, M. C., McMillin, M. J., Gildersleeve, H. I., Beck, A. E., Tabor, H. K., Cooper, G. M., Mefford, H. C. et al.** (2010). Exome sequencing identifies *MLL2* mutations as a cause of Kabuki syndrome. *Nat. Genet.* **42**, 790-793.
- Niessen, K. and Karsan, A.** (2008). Notch signaling in cardiac development. *Circ. Res.* **102**, 1169-1181.
- Nimura, K., Ura, K., Shiratori, H., Ikawa, M., Okabe, M., Schwartz, R. J. and Kaneda, Y.** (2009). A histone H3 lysine 36 trimethyltransferase links *Nkx2-5* to Wolf-Hirschhorn syndrome. *Nature* **460**, 287-291.
- Nomi, M., Oishi, I., Kani, S., Suzuki, H., Matsuda, T., Yoda, A., Kitamura, M., Itoh, K., Takeuchi, S., Takeda, K. et al.** (2001). Loss of *mRor1* enhances the heart and skeletal abnormalities in *mRor2*-deficient mice: redundant and pleiotropic functions of *mRor1* and *mRor2* receptor tyrosine kinases. *Mol. Cell. Biol.* **21**, 8329-8335.
- Norris, R. A., Moreno-Rodriguez, R. A., Sugi, Y., Hoffman, S., Amos, J., Hart, M. M., Potts, J. D., Goodwin, R. L. and Markwald, R. R.** (2008). Periostin regulates atrioventricular valve maturation. *Dev. Biol.* **316**, 200-213.
- Okamoto, N., Akimoto, N., Hidaka, N., Shoji, S. and Sumida, H.** (2010). Formal genesis of the outflow tracts of the heart revisited: previous works in the light of recent observations. *Congenit. Anom. (Kyoto)* **50**, 141-158.
- Okubo, A., Miyoshi, O., Baba, K., Takagi, M., Tsukamoto, K., Kinoshita, A., Yoshiura, K., Kishino, T., Ohta, T., Niihara, N. et al.** (2004). A novel *GATA4* mutation completely segregated with atrial septal defect in a large Japanese family. *J. Med. Genet.* **41**, e97.
- Olaopa, M., Zhou, H. M., Snider, P., Wang, J., Schwartz, R. J., Moon, A. M. and Conway, S. J.** (2011). *Pax3* is essential for normal cardiac neural crest morphogenesis but is not required during migration nor outflow tract septation. *Dev. Biol.* **356**, 308-322.
- Olsson, A. K., Dimberg, A., Kreuger, J. and Claesson-Welsh, L.** (2006). VEGF receptor signalling in control of vascular function. *Nat. Rev. Mol. Cell Biol.* **7**, 359-371.
- Park, E. J., Ogden, L. A., Talbot, A., Evans, S., Cai, C. L., Black, B. L., Frank, D. U. and Moon, A. M.** (2006). Required, tissue-specific roles for *Fgf8* in outflow tract formation and remodeling. *Development* **133**, 2419-2433.
- Pauli, A., Rinn, J. L. and Schier, A. F.** (2011). Non-coding RNAs as regulators of embryogenesis. *Nat. Rev. Genet.* **12**, 136-149.
- Pavan, M., Ruiz, V. F., Silva, F. A., Sobreira, T. J., Cravo, R. M., Vasconcelos, M., Marques, L. P., Mesquita, S. M., Krieger, J. E., Lopes, A. A. et al.** (2009). *ALDH1A2* (RALDH2) genetic variation in human congenital heart disease. *BMC Med. Genet.* **10**, 113.
- Person, A. D., Beiraghi, S., Sieben, C. M., Hermanson, S., Neumann, A. N., Robu, M. E., Schleiffarth, J. R., Billington, C. J., Jr, van Bokhoven, H., Hoogeboom, J. M. et al.** (2010). *WNT5A* mutations in patients with autosomal dominant Robinow syndrome. *Dev. Dyn.* **239**, 327-337.
- Pu, W. T., Ishiwata, T., Juraszek, A. L., Ma, Q. and Izumo, S.** (2004). *GATA4* is a dosage-sensitive regulator of cardiac morphogenesis. *Dev. Biol.* **275**, 235-244.
- Raid, R., Krinka, D., Bakhoff, L., Abdelwahid, E., Jokinen, E., Kärner, M., Malva, M., Meier, R., Pelliniemi, L. J., Ploom, M. et al.** (2009). Lack of *Gata3* results in conotruncal heart anomalies in mouse. *Mech. Dev.* **126**, 80-89.
- Ramsdell, A. F. and Markwald, R. R.** (1997). Induction of endocardial cushion tissue in the avian heart is regulated, in part, by TGFbeta-3-mediated autocrine signaling. *Dev. Biol.* **188**, 64-74.
- Randall, V., McCue, K., Roberts, C., Kyriakopoulou, V., Beddow, S., Barrett, A. N., Vitelli, F., Prescott, K., Shaw-Smith, C., Devriendt, K. et al.** (2009). Great vessel development requires biallelic expression of *Chd7* and *Tbx1* in pharyngeal ectoderm in mice. *J. Clin. Invest.* **119**, 3301-3310.
- Ranger, A. M., Grusby, M. J., Hodge, M. R., Gravalles, E. M., de la Brousse, F. C., Hoey, T., Mickanin, C., Baldwin, H. S. and Glimcher, L. H.** (1998). The transcription factor *NF-ATc* is essential for cardiac valve formation. *Nature* **392**, 186-190.
- Restivo, A., Piacentini, G., Placidi, S., Saffirio, C. and Marino, B.** (2006). Cardiac outflow tract: a review of some embryogenetic aspects of the conotruncal region of the heart. *Anat. Rec. A Discov. Mol. Cell. Evol. Biol.* **288**, 936-943.
- Rivera-Feliciano, J. and Tabin, C. J.** (2006). *Bmp2* instructs cardiac progenitors to form the heart-valve-inducing field. *Dev. Biol.* **295**, 580-588.
- Rivera-Feliciano, J., Lee, K. H., Kong, S. W., Rajagopal, S., Ma, Q., Springer, Z., Izumo, S., Tabin, C. J. and Pu, W. T.** (2006). Development of heart valves requires *Gata4* expression in endothelial-derived cells. *Development* **133**, 3607-3618.
- Robson, A., Allinson, K. R., Anderson, R. H., Henderson, D. J. and Arthur, H. M.** (2010). The TGFbeta type II receptor plays a critical role in the endothelial cells during cardiac development. *Dev. Dyn.* **239**, 2435-2442.
- Rochais, F., Dandonneau, M., Mesbah, K., Jarry, T., Mattei, M. G. and Kelly, R. G.** (2009). *Hes1* is expressed in the second heart field and is required for outflow tract development. *PLoS ONE* **4**, e6267.
- Roessler, E., Ouspenskaia, M. V., Karkera, J. D., Vélez, J. I., Kantipong, A., Lacbawan, F., Bowers, P., Belmont, J. W., Towbin, J. A., Goldmuntz, E. et al.** (2008). Reduced *NODAL* signaling strength via mutation of several pathway members including *FOXH1* is linked to human heart defects and holoprosencephaly. *Am. J. Hum. Genet.* **83**, 18-29.
- Romano, A. A., Allanson, J. E., Dahlgren, J., Gelb, B. D., Hall, B., Pierpont, M. E., Roberts, A. E., Robinson, W., Takemoto, C. M. and Noonan, J. A.** (2010). Noonan syndrome: clinical features, diagnosis, and management guidelines. *Pediatrics* **126**, 746-759.
- Romano, L. A. and Runyan, R. B.** (2000). *Slug* is an essential target of TGFbeta2 signaling in the developing chicken heart. *Dev. Biol.* **223**, 91-102.
- Rusanescu, G., Weissleder, R. and Aikawa, E.** (2008). Notch signaling in cardiovascular disease and calcification. *Curr. Cardiol. Rev.* **4**, 148-156.
- Ryckebusch, L., Wang, Z., Bertrand, N., Lin, S. C., Chi, X., Schwartz, R., Zaffran, S. and Niederreither, K.** (2008). Retinoic acid deficiency alters second heart field formation. *Proc. Natl. Acad. Sci. USA* **105**, 2913-2918.
- Sanford, L. P., Ormsby, I., Gittenberger-de Groot, A. C., Sariola, H., Friedman, R., Boivin, G. P., Cardell, E. L. and Doetschman, T.** (1997). TGFbeta2 knockout mice have multiple developmental defects that are non-overlapping with other TGFbeta knockout phenotypes. *Development* **124**, 2659-2670.
- Sarkozy, A., Esposito, G., Conti, E., Digilio, M. C., Marino, B., Calabrò, R., Pizzuti, A. and Dallapiccola, B.** (2005). *CRELD1* and *GATA4* gene analysis in patients with nonsyndromic atrioventricular canal defects. *Am. J. Med. Genet. A.* **139A**, 236-238.
- Saxena, A. and Tabin, C. J.** (2010). miRNA-processing enzyme *Dicer* is necessary for cardiac outflow tract alignment and chamber septation. *Proc. Natl. Acad. Sci. USA* **107**, 87-91.
- Schatteman, G. C., Motley, S. T., Effmann, E. L. and Bowen-Pope, D. F.** (1995). Platelet-derived growth factor receptor alpha subunit deleted Patch mouse exhibits severe cardiovascular dysmorphogenesis. *Teratology* **51**, 351-366.
- Schilham, M. W., Oosterwegel, M. A., Moerer, P., Ya, J., de Boer, P. A., van de Wetering, M., Verbeek, S., Lamers, W. H., Kruisbeek, A. M., Cumano, A. et al.** (1996). Defects in cardiac outflow tract formation and pro-B-lymphocyte expansion in mice lacking *Sox-4*. *Nature* **380**, 711-714.
- Schleiffarth, J. R., Person, A. D., Martinsen, B. J., Sukovich, D. J., Neumann, A., Baker, C. V., Lohr, J. L., Cornfield, D. N., Ekker, S. C. and Petryk, A.** (2007). *Wnt5a* is required for cardiac outflow tract septation in mice. *Pediatr. Res.* **61**, 386-391.

- Schneider, J. E., Böse, J., Bamforth, S. D., Gruber, A. D., Broadbent, C., Clarke, K., Neubauer, S., Lengeling, A. and Bhattacharya, S. (2004). Identification of cardiac malformations in mice lacking Ptdsr using a novel high-throughput magnetic resonance imaging technique. *BMC Dev. Biol.* **4**, 16.
- Schroeder, J. A., Jackson, L. F., Lee, D. C. and Camenisch, T. D. (2003). Form and function of developing heart valves: coordination by extracellular matrix and growth factor signaling. *J. Mol. Med.* **81**, 392-403.
- Schwabe, G. C., Trepczik, B., Süring, K., Brieske, N., Tucker, A. S., Sharpe, P. T., Minami, Y. and Mundlos, S. (2004). Ror2 knockout mouse as a model for the developmental pathology of autosomal recessive Robinow syndrome. *Dev. Dyn.* **229**, 400-410.
- Seo, S. and Kume, T. (2006). Forkhead transcription factors, Foxc1 and Foxc2, are required for the morphogenesis of the cardiac outflow tract. *Dev. Biol.* **296**, 421-436.
- Shalaby, F., Rossant, J., Yamaguchi, T. P., Gertsenstein, M., Wu, X. F., Breitman, M. L. and Schuh, A. C. (1995). Failure of blood-island formation and vasculogenesis in Flk-1-deficient mice. *Nature* **376**, 62-66.
- Sheehy, N. T., Cordes, K. R., White, M. P., Ivey, K. N. and Srivastava, D. (2010). The neural crest-enriched microRNA miR-452 regulates epithelial-mesenchymal signaling in the first pharyngeal arch. *Development* **137**, 4307-4316.
- Shikama, N., Lutz, W., Kretschmar, R., Sauter, N., Roth, J. F., Marino, S., Wittwer, J., Scheidweiler, A. and Eckner, R. (2003). Essential function of p300 acetyltransferase activity in heart, lung and small intestine formation. *EMBO J.* **22**, 5175-5185.
- Shirai, M., Imanaka-Yoshida, K., Schneider, M. D., Schwartz, R. J. and Morisaki, T. (2009). T-box 2, a mediator of Bmp-Smad signaling, induced hyaluronan synthase 2 and Tgfbeta2 expression and endocardial cushion formation. *Proc. Natl. Acad. Sci. USA* **106**, 18604-18609.
- Shull, M. M., Ormsby, I., Kier, A. B., Pawlowski, S., Diebold, R. J., Yin, M., Allen, R., Sidman, C., Proetzel, G., Calvin, D. et al. (1992). Targeted disruption of the mouse transforming growth factor-beta 1 gene results in multifocal inflammatory disease. *Nature* **359**, 693-699.
- Sibilia, M., Wagner, B., Hoebertz, A., Elliott, C., Marino, S., Jochum, W. and Wagner, E. F. (2003). Mice humanised for the EGF receptor display hypomorphic phenotypes in skin, bone and heart. *Development* **130**, 4515-4525.
- Singh, N., Trivedi, C. M., Lu, M., Mullican, S. E., Lazar, M. A. and Epstein, J. A. (2011). Histone deacetylase 3 regulates smooth muscle differentiation in neural crest cells and development of the cardiac outflow tract. *Circ. Res.* **109**, 1240-1249.
- Snarr, B. S., O'Neal, J. L., Chintalapudi, M. R., Wirrig, E. E., Phelps, A. L., Kubalak, S. W. and Wessels, A. (2007a). Isl1 expression at the venous pole identifies a novel role for the second heart field in cardiac development. *Circ. Res.* **101**, 971-974.
- Snarr, B. S., Wirrig, E. E., Phelps, A. L., Trusk, T. C. and Wessels, A. (2007b). A spatiotemporal evaluation of the contribution of the dorsal mesenchymal protrusion to cardiac development. *Dev. Dyn.* **236**, 1287-1294.
- Snarr, B. S., Kern, C. B. and Wessels, A. (2008). Origin and fate of cardiac mesenchyme. *Dev. Dyn.* **237**, 2804-2819.
- Song, L., Zhao, M., Wu, B., Zhou, B., Wang, Q. and Jiao, K. (2011). Cell autonomous requirement of endocardial Smad4 during atrioventricular cushion development in mouse embryos. *Dev. Dyn.* **240**, 211-220.
- Sperling, S., Grimm, C. H., Dunkel, I., Mebus, S., Sperling, H. P., Ebner, A., Galli, R., Lehrach, H., Fusch, C., Berger, F. et al. (2005). Identification and functional analysis of CITED2 mutations in patients with congenital heart defects. *Hum. Mutat.* **26**, 575-582.
- Sridurongrit, S., Larsson, J., Schwartz, R., Ruiz-Lozano, P. and Kaartinen, V. (2008). Signaling via the Tgf-beta type I receptor Alk5 in heart development. *Dev. Biol.* **322**, 208-218.
- Srivastava, D. (2006). Making or breaking the heart: from lineage determination to morphogenesis. *Cell* **126**, 1037-1048.
- Stalmans, I., Lambrechts, D., De Smet, F., Jansen, S., Wang, J., Maity, S., Kneer, P., von der Ohe, M., Swillen, A., Maes, C. et al. (2003). VEGF: a modifier of the del22q11 (DiGeorge) syndrome? *Nat. Med.* **9**, 173-182.
- Stankunas, K., Shang, C., Twu, K. Y., Kao, S. C., Jenkins, N. A., Copeland, N. G., Sanyal, M., SELLER, L., Cleary, M. L. and Chang, C. P. (2008). Pbx/Meis deficiencies demonstrate multigenetic origins of congenital heart disease. *Circ. Res.* **103**, 702-709.
- Stankunas, K., Ma, G. K., Kuhnert, F. J., Kuo, C. J. and Chang, C. P. (2010). VEGF signaling has distinct spatiotemporal roles during heart valve development. *Dev. Biol.* **347**, 325-336.
- Stanley, E. G., Biben, C., Elefanti, A., Barnett, L., Koentgen, F., Robb, L. and Harvey, R. P. (2002). Efficient Cre-mediated deletion in cardiac progenitor cells conferred by a 3'UTR-ires-Cre allele of the homeobox gene Nkx2-5. *Int. J. Dev. Biol.* **46**, 431-439.
- Stennard, F. A., Costa, M. W., Lai, D., Biben, C., Furtado, M. B., Solloway, M. J., McCulley, D. J., Leimena, C., Preis, J. I., Dunwoodie, S. L. et al. (2005). Murine T-box transcription factor Tbx20 acts as a repressor during heart development, and is essential for adult heart integrity, function and adaptation. *Development* **132**, 2451-2462.
- Svensson, E. C., Huggins, G. S., Lin, H., Clendenen, C., Jiang, F., Tufts, R., Dardik, F. B. and Leiden, J. M. (2000). A syndrome of tricuspid atresia in mice with a targeted mutation of the gene encoding Fog-2. *Nat. Genet.* **25**, 353-356.
- Takeuchi, J. K., Ohgi, M., Koshiba-Takeuchi, K., Shiratori, H., Sakaki, I., Ogura, K., Saijoh, Y. and Ogura, T. (2003). Tbx5 specifies the left/right ventricles and ventricular septum position during cardiogenesis. *Development* **130**, 5953-5964.
- Takeuchi, J. K., Mileikowska, M., Koshiba-Takeuchi, K., Heidt, A. B., Mori, A. D., Arruda, E. P., Gertsenstein, M., Georges, R., Davidson, L., Mo, R. et al. (2005). Tbx20 dose-dependently regulates transcription factor networks required for mouse heart and motoneuron development. *Development* **132**, 2463-2474.
- Takeuchi, J. K., Lou, X., Alexander, J. M., Sugizaki, H., Delgado-Olguín, P., Holloway, A. K., Mori, A. D., Wylie, J. N., Munson, C., Zhu, Y. et al. (2011). Chromatin remodelling complex dosage modulates transcription factor function in heart development. *Nat. Commun.* **2**, 187.
- Takahara, Y., Tomotsune, D., Shirai, M., Katoh-Fukui, Y., Nishii, K., Motaleb, M. A., Nomura, M., Tsuchiya, R., Fujita, Y., Shibata, Y. et al. (1997). Targeted disruption of the mouse homologue of the Drosophila polyhomeotic gene leads to altered anteroposterior patterning and neural crest defects. *Development* **124**, 3673-3682.
- Tallquist, M. D. and Soriano, P. (2003). Cell autonomous requirement for PDGFRalpha in populations of cranial and cardiac neural crest cells. *Development* **130**, 507-518.
- Tam, P. P., Parameswaran, M., Kinder, S. J. and Weinberger, R. P. (1997). The allocation of epiblast cells to the embryonic heart and other mesodermal lineages: the role of ingression and tissue movement during gastrulation. *Development* **124**, 1631-1642.
- Tartaglia, M., Mehler, E. L., Goldberg, R., Zampino, G., Brunner, H. G., Kremer, H., van der Burgt, I., Crosby, A. H., Ion, A., Jeffery, S. et al. (2001). Mutations in PTPN11, encoding the protein tyrosine phosphatase SHP-2, cause Noonan syndrome. *Nat. Genet.* **29**, 465-468.
- Teng, L., Mundell, N. A., Frist, A. Y., Wang, Q. and Labosky, P. A. (2008). Requirement for Foxd3 in the maintenance of neural crest progenitors. *Development* **135**, 1615-1624.
- Tessari, A., Pietrobon, M., Notte, A., Cifelli, G., Gage, P. J., Schneider, M. D., Lembo, G. and Campione, M. (2008). Myocardial Pitx2 differentially regulates the left atrial identity and ventricular asymmetric remodeling programs. *Circ. Res.* **102**, 813-822.
- Tevosian, S. G., Deconinck, A. E., Tanaka, M., Schinke, M., Litovsky, S. H., Izumo, S., Fujiwara, Y. and Orkin, S. H. (2000). FOG-2, a cofactor for GATA transcription factors, is essential for heart morphogenesis and development of coronary vessels from epicardium. *Cell* **101**, 729-739.
- Thomas, P. S., Kim, J., Nunez, S., Glogauer, M. and Kaartinen, V. (2010). Neural crest cell-specific deletion of Rac1 results in defective cell-matrix interactions and severe craniofacial and cardiovascular malformations. *Dev. Biol.* **340**, 613-625.
- Tian, Y., Yuan, L., Goss, A. M., Wang, T., Yang, J., Lepore, J. J., Zhou, D., Schwartz, R. J., Patel, V., Cohen, E. D. et al. (2010). Characterization and in vivo pharmacological rescue of a Wnt2-Gata6 pathway required for cardiac inflow tract development. *Dev. Cell* **18**, 275-287.
- Timmerman, L. A., Grego-Bessa, J., Raya, A., Bertrán, E., Pérez-Pomares, J. M., Díez, J., Aranda, S., Palomo, S., McCormick, F., Izpisua-Belmonte, J. C. et al. (2004). Notch promotes epithelial-mesenchymal transition during cardiac development and oncogenic transformation. *Genes Dev.* **18**, 99-115.
- Todorovic, V., Finnegan, E., Freyer, L., Zilberberg, L., Ota, M. and Rifkin, D. B. (2011). Long form of latent TGF-beta binding protein 1 (Ltbp1L) regulates cardiac valve development. *Dev. Dyn.* **240**, 176-187.
- Toyofuku, T., Yoshida, J., Sugimoto, T., Yamamoto, M., Makino, N., Takamatsu, H., Takegahara, N., Suto, F., Hori, M., Fujisawa, H. et al. (2008). Repulsive and attractive semaphorins cooperate to direct the navigation of cardiac neural crest cells. *Dev. Biol.* **321**, 251-262.
- Vallejo-Illarramendi, A., Zang, K. and Reichardt, L. F. (2009). Focal adhesion kinase is required for neural crest cell morphogenesis during mouse cardiovascular development. *J. Clin. Invest.* **119**, 2218-2230.
- van den Akker, N. M., Molin, D. G., Peters, P. P., Maas, S., Wisse, L. J., van Brempt, R., van Munsteren, C. J., Bartelings, M. M., Poelmann, R. E., Carmeliet, P. et al. (2007). Tetralogy of fallot and alterations in vascular endothelial growth factor-A signaling and notch signaling in mouse embryos solely expressing the VEGF120 isoform. *Circ. Res.* **100**, 842-849.
- Van den Akker, N. M., Winkel, L. C., Nisancioglu, M. H., Maas, S., Wisse, L. J., Armulik, A., Poelmann, R. E., Lie-Venema, H., Bethsholtz, C. and Gittenberger-de Groot, A. C. (2008). PDGF-B signaling is important for murine cardiac development: its role in developing atrioventricular valves, coronaries, and cardiac innervation. *Dev. Dyn.* **237**, 494-503.
- Ventura, A., Young, A. G., Winslow, M. M., Lintault, L., Meissner, A., Erkeland, S. J., Newman, J., Bronson, R. T., Crowley, D., Stone, J. R. et al.

- (2008). Targeted deletion reveals essential and overlapping functions of the miR-17 through 92 family of miRNA clusters. *Cell* **132**, 875-886.
- Vermot, J., Messaddeq, N., Niederreither, K., Dierich, A. and Dollé, P.** (2006). Rescue of morphogenetic defects and of retinoic acid signaling in retinaldehyde dehydrogenase 2 (Raldh2) mouse mutants by chimerism with wild-type cells. *Differentiation* **74**, 661-668.
- Verzi, M. P., McCulley, D. J., De Val, S., Dodou, E. and Black, B. L.** (2005). The right ventricle, outflow tract, and ventricular septum comprise a restricted expression domain within the secondary/anterior heart field. *Dev. Biol.* **287**, 134-145.
- Vincent, S. D. and Buckingham, M. E.** (2010). How to make a heart: the origin and regulation of cardiac progenitor cells. *Curr. Top. Dev. Biol.* **90**, 1-41.
- Vincenz, J. W., McWhirter, J. R., Murre, C., Baldini, A. and Furuta, Y.** (2005). Fgf15 is required for proper morphogenesis of the mouse cardiac outflow tract. *Genesis* **41**, 192-201.
- Vitelli, F., Morishima, M., Taddei, I., Lindsay, E. A. and Baldini, A.** (2002). Tbx1 mutation causes multiple cardiovascular defects and disrupts neural crest and cranial nerve migratory pathways. *Hum. Mol. Genet.* **11**, 915-922.
- Vitelli, F., Huynh, T. and Baldini, A.** (2009). Gain of function of Tbx1 affects pharyngeal and heart development in the mouse. *Genesis* **47**, 188-195.
- von Both, I., Silvestri, C., Erdemir, T., Lickert, H., Walls, J. R., Henkelman, R. M., Rossant, J., Harvey, R. P., Attisano, L. and Wrana, J. L.** (2004). Foxh1 is essential for development of the anterior heart field. *Dev. Cell* **7**, 331-345.
- Waldo, K. L., Kumiski, D. H., Wallis, K. T., Stadt, H. A., Hutson, M. R., Platt, D. H. and Kirby, M. L.** (2001). Conotruncal myocardium arises from a secondary heart field. *Development* **128**, 3179-3188.
- Wang, J., Sridurongrit, S., Dudas, M., Thomas, P., Nagy, A., Schneider, M. D., Epstein, J. A. and Kaartinen, V.** (2005). Atrioventricular cushion transformation is mediated by ALK2 in the developing mouse heart. *Dev. Biol.* **286**, 299-310.
- Wang, J., Nagy, A., Larsson, J., Dudas, M., Sucov, H. M. and Kaartinen, V.** (2006). Defective ALK5 signaling in the neural crest leads to increased postmigratory neural crest cell apoptosis and severe outflow tract defects. *BMC Dev. Biol.* **6**, 51.
- Wang, S., Aurora, A. B., Johnson, B. A., Qi, X., McAnally, J., Hill, J. A., Richardson, J. A., Bassel-Duby, R. and Olson, E. N.** (2008). The endothelial-specific microRNA miR-126 governs vascular integrity and angiogenesis. *Dev. Cell* **15**, 261-271.
- Wang, Z., Zhai, W., Richardson, J. A., Olson, E. N., Meneses, J. J., Firpo, M. T., Kang, C., Skarnes, W. C. and Tjian, R.** (2004). Polybromo protein BAF180 functions in mammalian cardiac chamber maturation. *Genes Dev.* **18**, 3106-3116.
- Warthen, D. M., Moore, E. C., Kamath, B. M., Morrissette, J. J., Sanchez, P., Piccoli, D. A., Krantz, I. D. and Spinner, N. B.** (2006). Jagged1 (JAG1) mutations in Alagille syndrome: increasing the mutation detection rate. *Hum. Mutat.* **27**, 436-443.
- Washington Smoak, I., Byrd, N. A., Abu-Issa, R., Goddeeris, M. M., Anderson, R., Morris, J., Yamamura, K., Klingensmith, J. and Meyers, E. N.** (2005). Sonic hedgehog is required for cardiac outflow tract and neural crest cell development. *Dev. Biol.* **283**, 357-372.
- Watanabe, Y., Miyagawa-Tomita, S., Vincent, S. D., Kelly, R. G., Moon, A. M. and Buckingham, M. E.** (2010). Role of mesodermal FGF8 and FGF10 overlaps in the development of the arterial pole of the heart and pharyngeal arch arteries. *Circ. Res.* **106**, 495-503.
- Webb, S., Brown, N. A. and Anderson, R. H.** (1998). Formation of the atrioventricular septal structures in the normal mouse. *Circ. Res.* **82**, 645-656.
- Wessels, A. and Sedmera, D.** (2003). Developmental anatomy of the heart: a tale of mice and man. *Physiol. Genomics* **15**, 165-176.
- Wessels, A., Markman, M. W., Vermeulen, J. L., Anderson, R. H., Moorman, A. F. and Lamers, W. H.** (1996). The development of the atrioventricular junction in the human heart. *Circ. Res.* **78**, 110-117.
- Wessels, M. W. and Willems, P. J.** (2010). Genetic factors in non-syndromic congenital heart malformations. *Clin. Genet.* **78**, 103-123.
- Winston, J. B., Erlich, J. M., Green, C. A., Aluko, A., Kaiser, K. A., Takematsu, M., Barlow, R. S., Sureka, A. O., LaPage, M. J., Janss, L. L. et al.** (2010). Heterogeneity of genetic modifiers ensures normal cardiac development. *Circulation* **121**, 1313-1321.
- Wirrig, E. E., Snarr, B. S., Chintalapudi, M. R., O'Neal, J. L., Phelps, A. L., Barth, J. L., Fresco, V. M., Kern, C. B., Mjaatvedt, C. H., Toole, B. P. et al.** (2007). Cartilage link protein 1 (Crtl1), an extracellular matrix component playing an important role in heart development. *Dev. Biol.* **310**, 291-303.
- Wooten, E. C., Iyer, L. K., Montefusco, M. C., Hedgepeth, A. K., Payne, D. D., Kapur, N. K., Housman, D. E., Mendelsohn, M. E. and Huggins, G. S.** (2010). Application of gene network analysis techniques identifies AXIN1/PDIA2 and endoglin haplotypes associated with bicuspid aortic valve. *PLoS ONE* **5**, e8830.
- Wu, B., Wang, Y., Lui, W., Langworthy, M., Tompkins, K. L., Hatzopoulos, A. K., Baldwin, H. S. and Zhou, B.** (2011). Nfatc1 coordinates valve endocardial cell lineage development required for heart valve formation. *Circ. Res.* **109**, 183-192.
- Wu, H., Kao, S. C., Barrientos, T., Baldwin, S. H., Olson, E. N., Crabtree, G. R., Zhou, B. and Chang, C. P.** (2007). Down syndrome critical region-1 is a transcriptional target of nuclear factor of activated T cells-c1 within the endocardium during heart development. *J. Biol. Chem.* **282**, 30673-30679.
- Wurdak, H., Ittner, L. M., Lang, K. S., Leveen, P., Suter, U., Fischer, J. A., Karlsson, S., Born, W. and Sommer, L.** (2005). Inactivation of TGFbeta signaling in neural crest stem cells leads to multiple defects reminiscent of DiGeorge syndrome. *Genes Dev.* **19**, 530-535.
- Xu, H., Morishima, M., Wylie, J. N., Schwartz, R. J., Bruneau, B. G., Lindsay, E. A. and Baldini, A.** (2004). Tbx1 has a dual role in the morphogenesis of the cardiac outflow tract. *Development* **131**, 3217-3227.
- Ya, J., Schilham, M. W., de Boer, P. A., Moorman, A. F., Clevers, H. and Lamers, W. H.** (1998). Sox4-deficiency syndrome in mice is an animal model for common trunk. *Circ. Res.* **83**, 986-994.
- Yanagisawa, H., Hammer, R. E., Richardson, J. A., Williams, S. C., Clouthier, D. E. and Yanagisawa, M.** (1998a). Role of Endothelin-1/Endothelin-A receptor-mediated signaling pathway in the aortic arch patterning in mice. *J. Clin. Invest.* **102**, 22-33.
- Yanagisawa, H., Yanagisawa, M., Kapur, R. P., Richardson, J. A., Williams, S. C., Clouthier, D. E., de Wit, D., Emoto, N. and Hammer, R. E.** (1998b). Dual genetic pathways of endothelin-mediated intercellular signaling revealed by targeted disruption of endothelin converting enzyme-1 gene. *Development* **125**, 825-836.
- Yanagisawa, H., Hammer, R. E., Richardson, J. A., Emoto, N., Williams, S. C., Takeda, S., Clouthier, D. E. and Yanagisawa, M.** (2000). Disruption of ECE-1 and ECE-2 reveals a role for endothelin-converting enzyme-2 in murine cardiac development. *J. Clin. Invest.* **105**, 1373-1382.
- Yang, L., Cai, C. L., Lin, L., Qyang, Y., Chung, C., Monteiro, R. M., Mummery, C. L., Fishman, G. I., Cogen, A. and Evans, S.** (2006). Isl1Cre reveals a common Bmp pathway in heart and limb development. *Development* **133**, 1575-1585.
- Ye, M., Coldren, C., Liang, X., Mattina, T., Goldmuntz, E., Benson, D. W., Ivy, D., Perryman, M. B., Garrett-Sinha, L. A. and Grossfeld, P.** (2010). Deletion of ETS-1, a gene in the Jacobsen syndrome critical region, causes ventricular septal defects and abnormal ventricular morphology in mice. *Hum. Mol. Genet.* **19**, 648-656.
- Yu, Q., Shen, Y., Chatterjee, B., Siegfried, B. H., Leatherbury, L., Rosenthal, J., Lucas, J. F., Wessels, A., Spurney, C. F., Wu, Y. J. et al.** (2004). ENU induced mutations causing congenital cardiovascular anomalies. *Development* **131**, 6211-6223.
- Zaffran, S., Kelly, R. G., Meilhac, S. M., Buckingham, M. E. and Brown, N. A.** (2004). Right ventricular myocardium derives from the anterior heart field. *Circ. Res.* **95**, 261-268.
- Zeini, M., Hang, C. T., Lehrer-Graiwer, J., Dao, T., Zhou, B. and Chang, C. P.** (2009). Spatial and temporal regulation of coronary vessel formation by calcineurin-NFAT signaling. *Development* **136**, 3335-3345.
- Zhang, H. and Fisher, S. A.** (2007). Conditioning effect of blood flow on resistance artery smooth muscle myosin phosphatase. *Circ. Res.* **100**, 730-737.
- Zhang, J., Lin, Y., Zhang, Y., Lan, Y., Lin, C., Moon, A. M., Schwartz, R. J., Martin, J. F. and Wang, F.** (2008). Frs2alpha-deficiency in cardiac progenitors disrupts a subset of FGF signals required for outflow tract morphogenesis. *Development* **135**, 3611-3622.
- Zhang, Y., Singh, M. K., Degenhardt, K. R., Lu, M. M., Bennett, J., Yoshida, Y. and Epstein, J. A.** (2009). Tie2Cre-mediated inactivation of plexinD1 results in congenital heart, vascular and skeletal defects. *Dev. Biol.* **325**, 82-93.
- Zhang, Z., Huynh, T. and Baldini, A.** (2006). Mesodermal expression of Tbx1 is necessary and sufficient for pharyngeal arch and cardiac outflow tract development. *Development* **133**, 3587-3595.
- Zhao, Y., Ransom, J. F., Li, A., Vedantham, V., von Drehle, M., Muth, A. N., Tsuchihashi, T., McManus, M. T., Schwartz, R. J. and Srivastava, D.** (2007). Dysregulation of cardiogenesis, cardiac conduction, and cell cycle in mice lacking miRNA-1-2. *Cell* **129**, 303-317.
- Zhou, B., Wu, B., Tompkins, K. L., Boyer, K. L., Grindley, J. C. and Baldwin, H. S.** (2005). Characterization of Nfatc1 regulation identifies an enhancer required for gene expression that is specific to pro-valve endocardial cells in the developing heart. *Development* **132**, 1137-1146.
- Zhou, W., Lin, L., Majumdar, A., Li, X., Zhang, X., Liu, W., Etheridge, L., Shi, Y., Martin, J., Van de Ven, W. et al.** (2007). Modulation of morphogenesis by noncanonical Wnt signaling requires ATF/CREB family-mediated transcriptional activation of TGFbeta2. *Nat. Genet.* **39**, 1225-1234.
